# Supplementary material for: Untargeted Lipidomics Method for the Discrimination of Five Crab Species by Ultra-High-Performance Liquid Chromatography High-Resolution Mass Spectrometry Combined with Chemometrics
Source: MDPI journal article supplement (doi:10.3390/molecules28093653), 2023-04-22
Supplement: s1 [file molecules-2267932-supplementary.pdf › molecules-2267932-supplementary.pdf]

### *Supplementary materials*

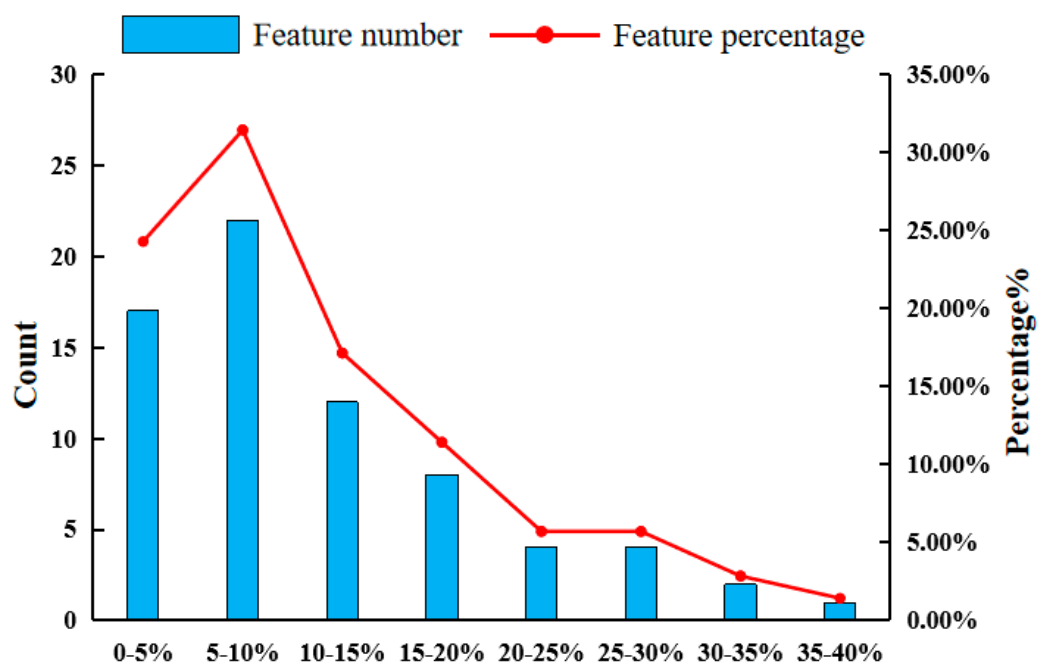

**Figure S1.** RSD distribution of peak area of seven internal standards in 10 groups of different samples.

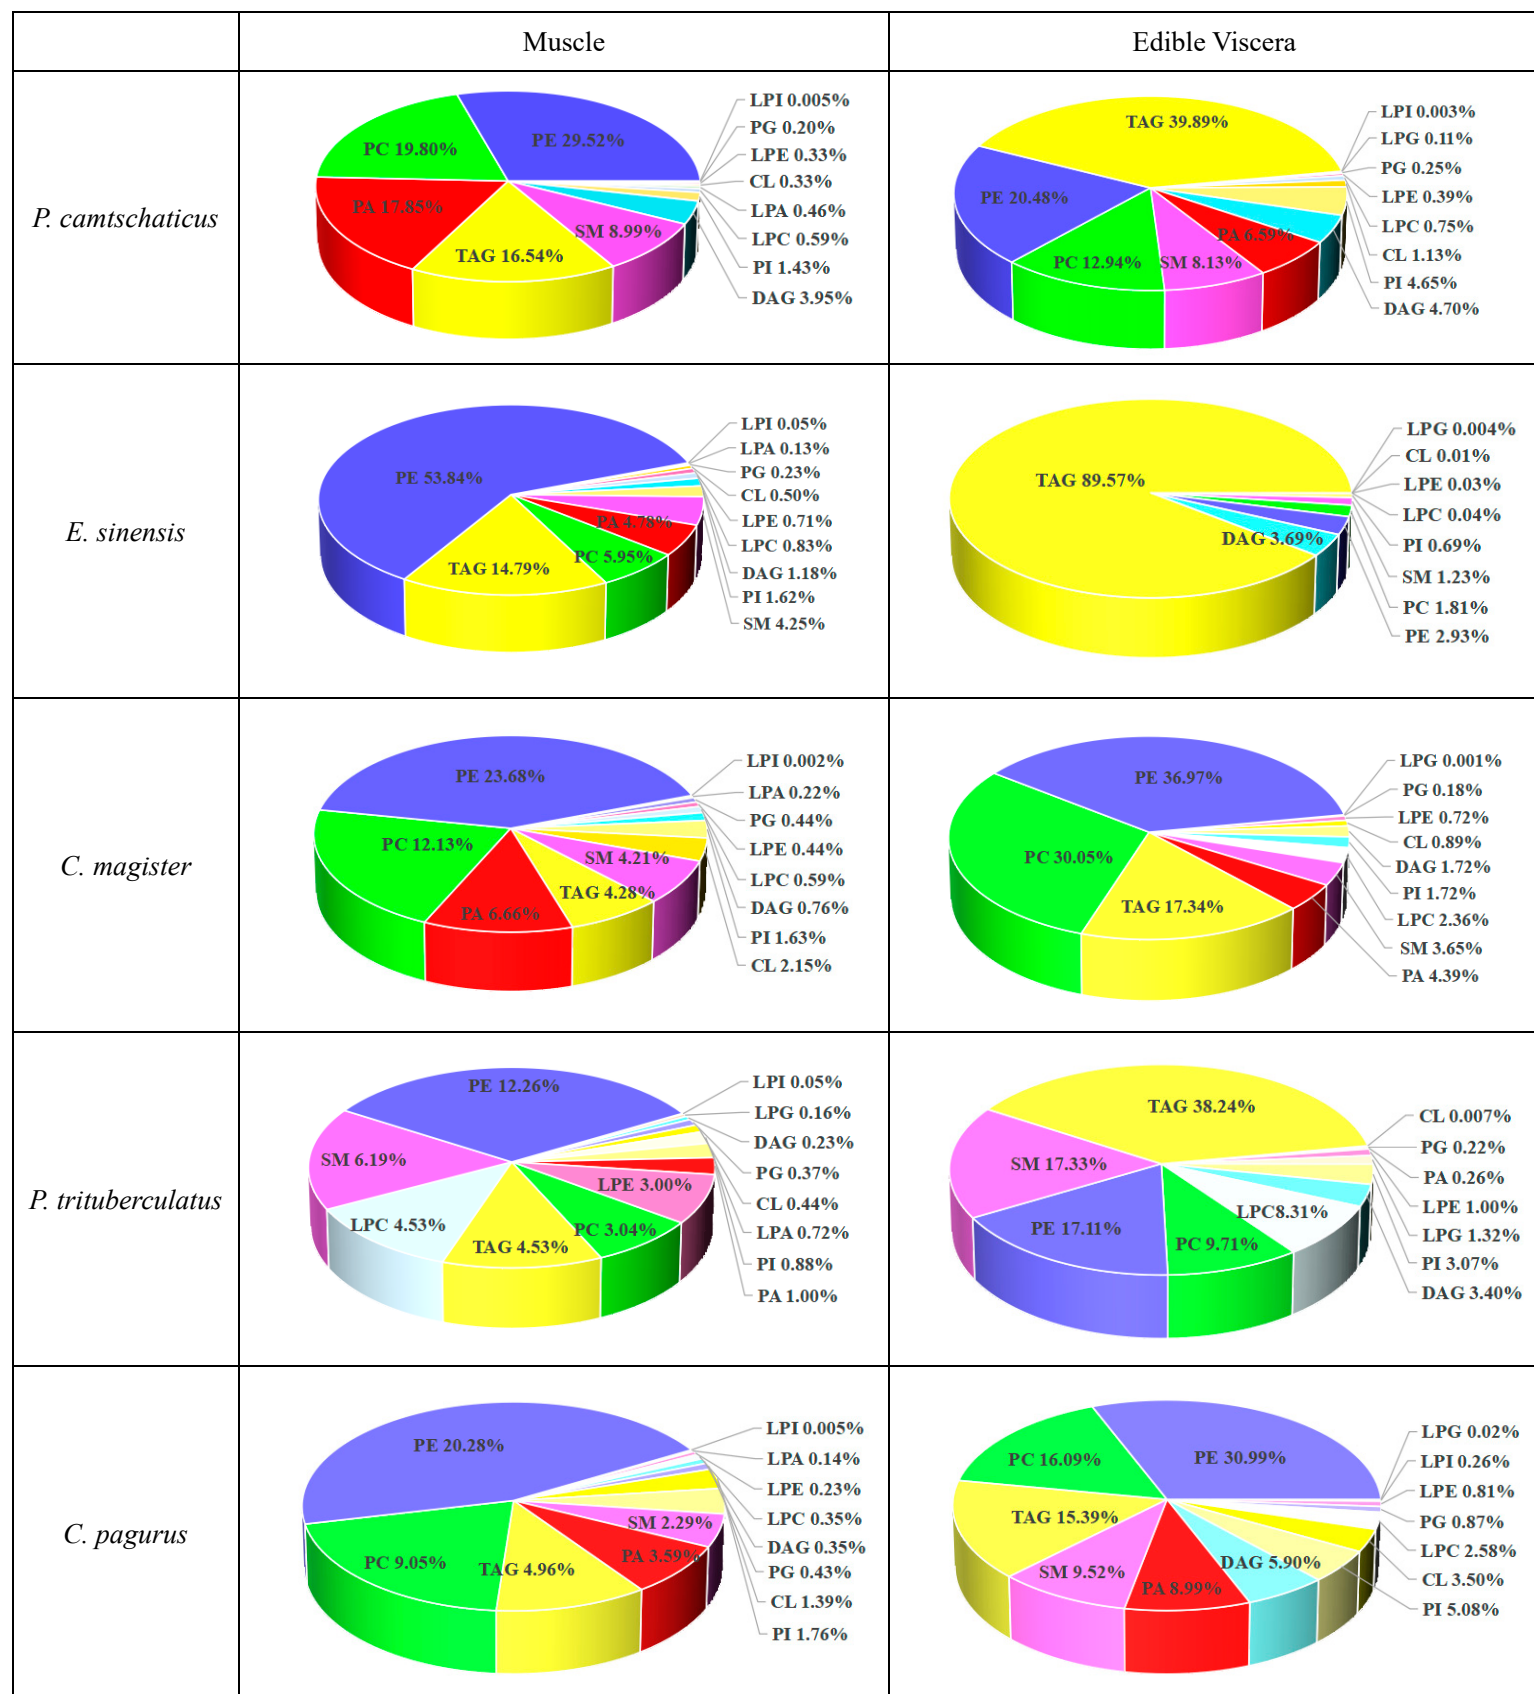

**Figure S2.** Lipid composition (%) in muscles and edible viscera of five crab species

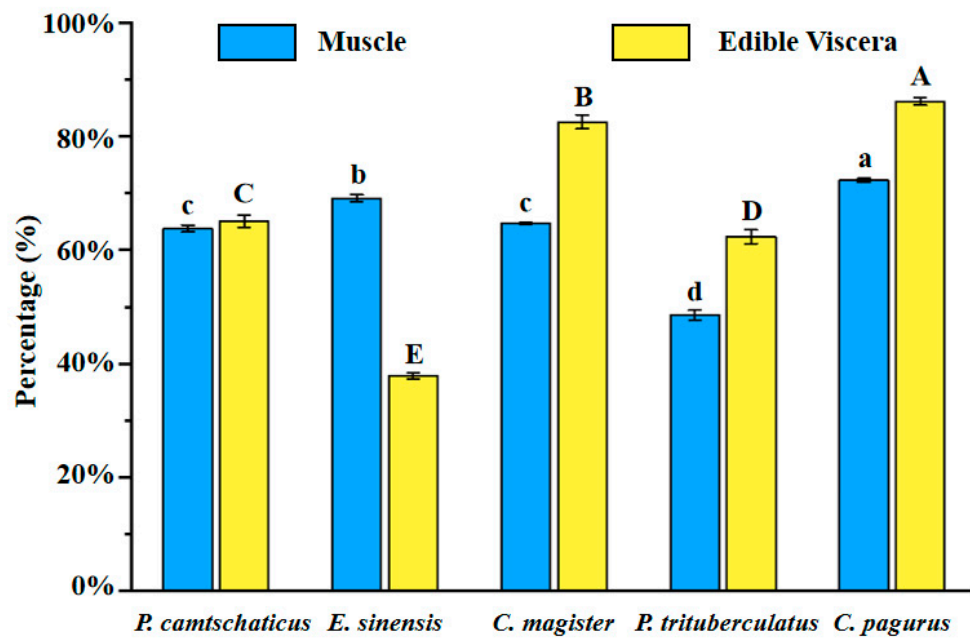

**Figure S3.** The percentage contents of DHA/EPA-PLs and DHA/EPA-TAGs in total lipid extracted from crab muscle and edible viscera. Data are expressed as the mean  $\pm$  SD. Different letters indicate significant difference ( $p < 0.05$ ) among different samples.

(a)

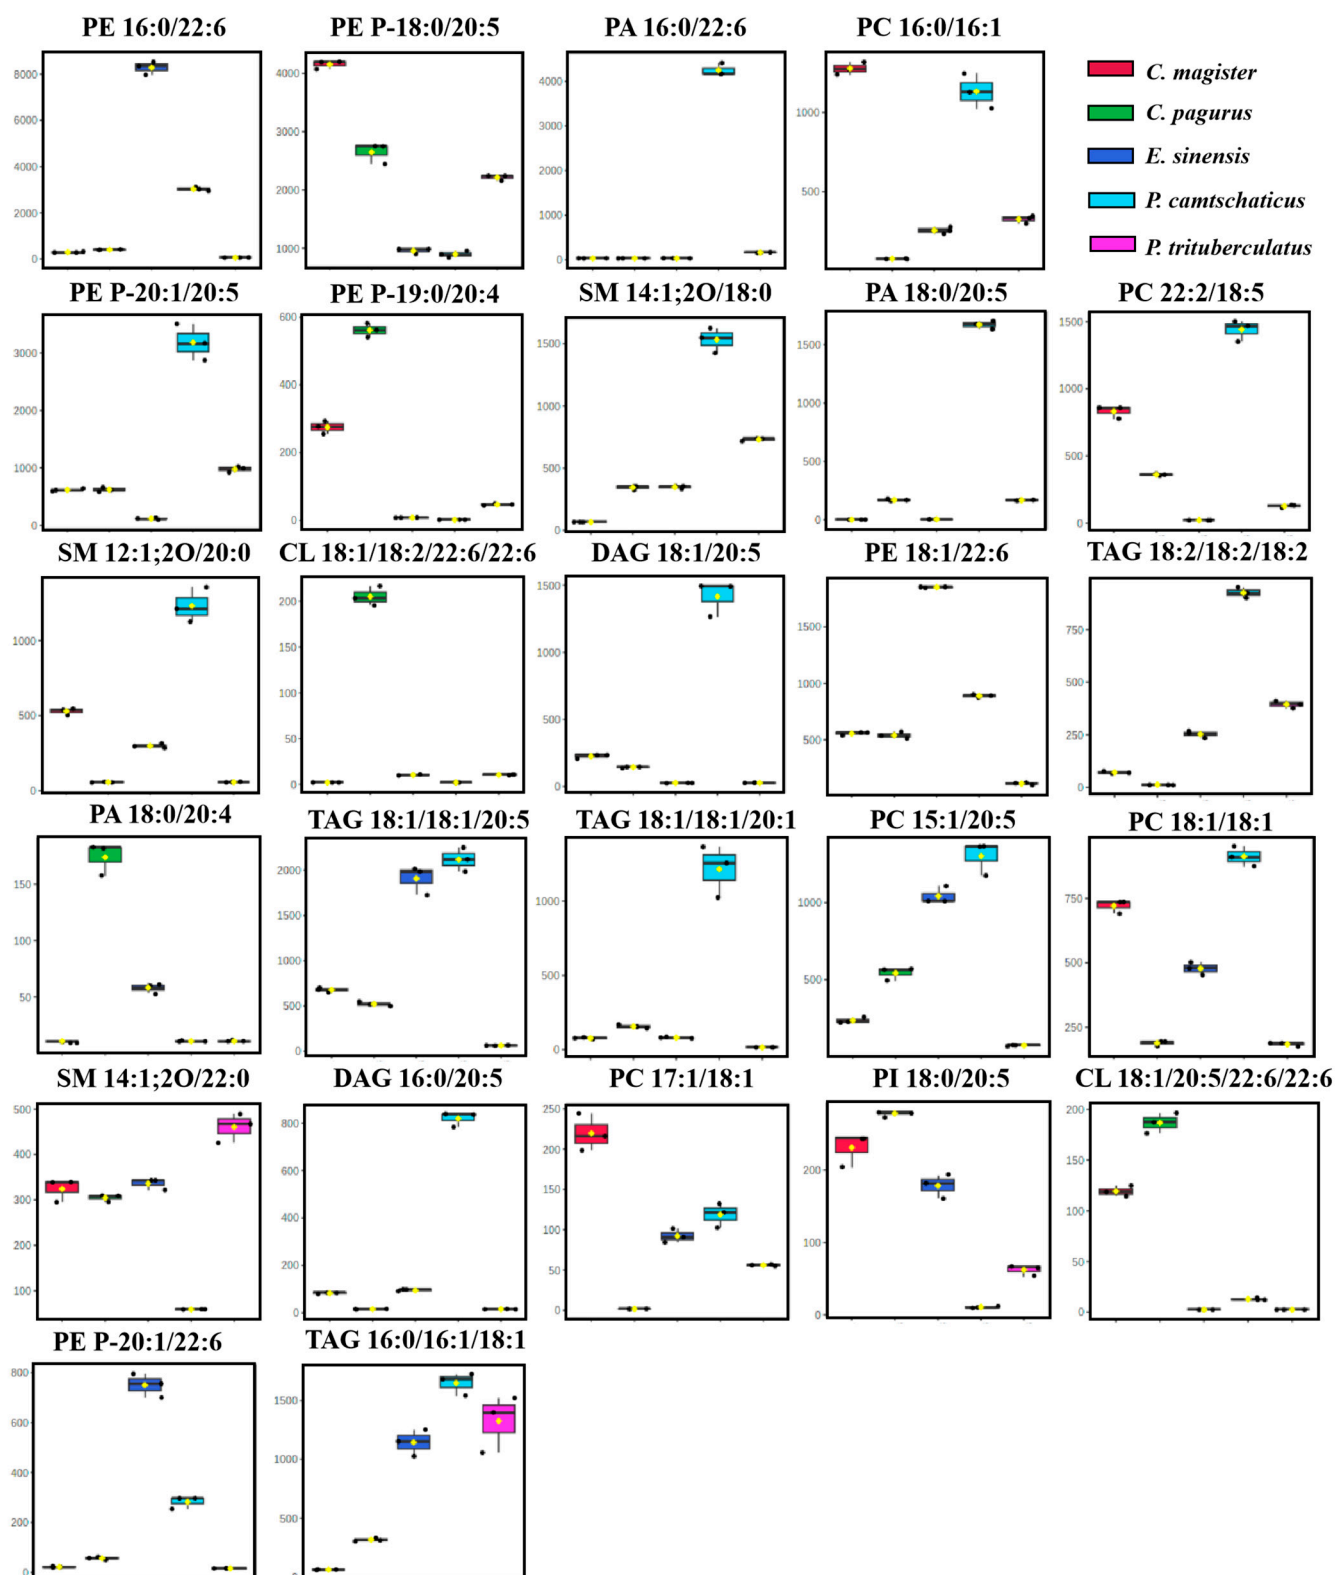

(b)

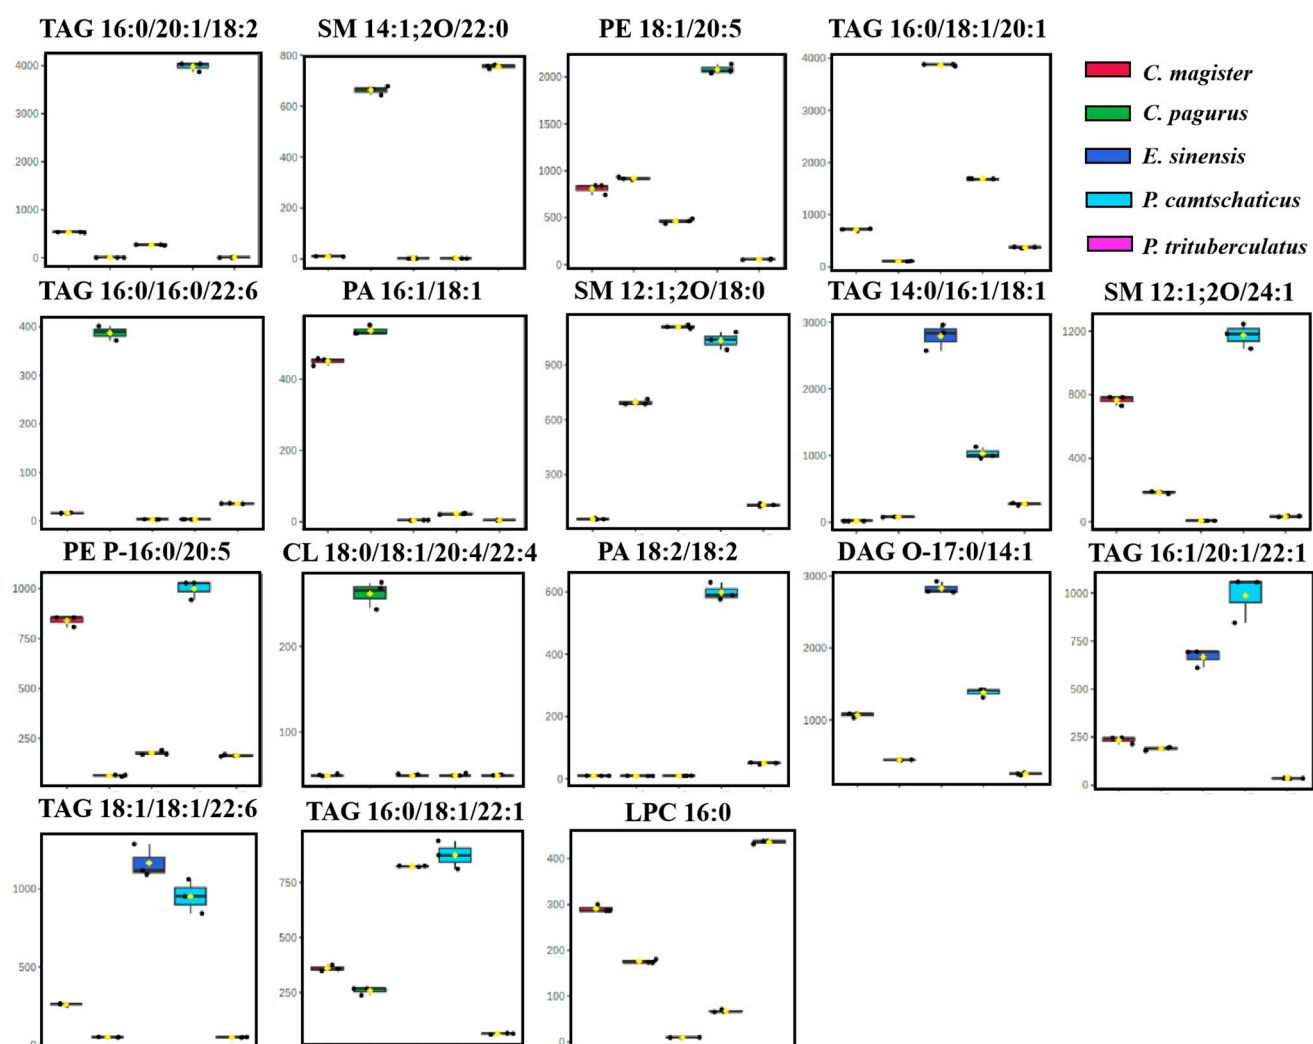

**Figure S4.** Box plots of the significantly different lipids in muscles (a) and edible viscera (b) of five crab species

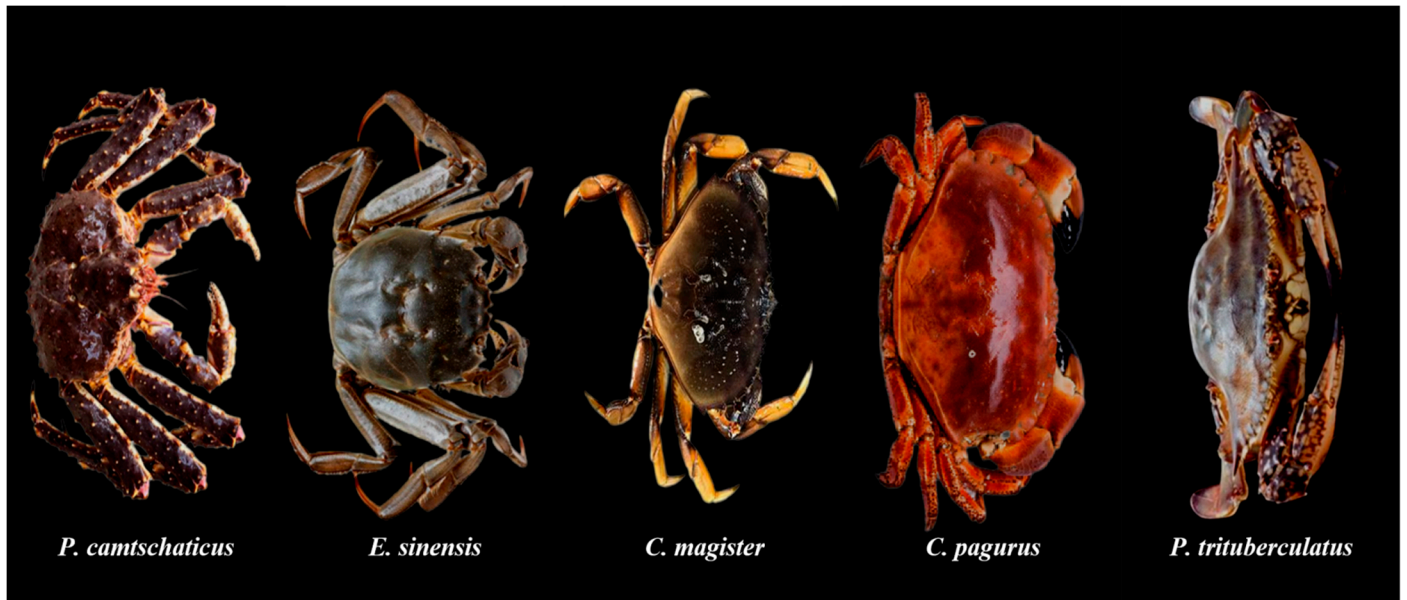

**Figure S5:** Optical images of the crab species.

**Table S1.** Concentration (ng/mL) of 7 lipid standards and corresponding internal standard (IS) for construction of calibration curves

| Standard              | Conc. 1 | Conc. 2 | Conc. 3 | Conc. 4 | Conc. 5 | Conc. 6 | Conc. 7 | IS                        | IS Conc. |
|-----------------------|---------|---------|---------|---------|---------|---------|---------|---------------------------|----------|
| PI 8:0/8:0            | 62500   | 12500   | 6250    | 1250    | 625     | 312     | 125     | PI 15:0/18:1(d7)          | 1666     |
| PE 17:0/17:0          | 433500  | 86700   | 43350   | 8670    | 4335    | 2168    | 867     | PE 15:0/18:1(d7)          | 833      |
| PC 17:0/17:0          | 562500  | 112500  | 56250   | 11250   | 5625    | 2812    | 1125    | PC 15:0/18:1(d7)          | 26666    |
| PG 17:0/17:0          | 546000  | 109200  | 54600   | 10920   | 5460    | 2730    | 1092    | PG 15:0/18:1(d7)          | 5000     |
| PA 17:0/17:0          | 521000  | 104200  | 52100   | 10420   | 5210    | 2605    | 1042    | PA 15:0/18:1(d7)          | 1166     |
| SM d18:1/12:0         | 866500  | 173300  | 86650   | 17330   | 8665    | 4332    | 1733    | SM d18:1/18:1(d9)         | 5000     |
| TAG<br>18:2/18:2/18:2 | 5700000 | 1140000 | 570000  | 114000  | 57000   | 28500   | 11400   | TAG<br>15:0/18:1(d7)/15:0 | 9166     |

**Table S2.** Total lipids content in five kinds of crabs

| Species                   | Muscle                  | Edible viscera           |
|---------------------------|-------------------------|--------------------------|
|                           | mg/g (dry powder)       | mg/g (dry powder)        |
| <i>P. camtschaticus</i>   | 193.3±15.4 <sup>a</sup> | 766.3±35.1 <sup>a</sup>  |
| <i>E. sinensis</i>        | 157.6±17.8 <sup>a</sup> | 761.0±111.8 <sup>a</sup> |
| <i>C. magister</i>        | 197.6±20.4 <sup>a</sup> | 426.7±11.5 <sup>c</sup>  |
| <i>P. trituberculatus</i> | 182.8±32.0 <sup>a</sup> | 594.4±4.9 <sup>b</sup>   |
| <i>C. pagurus</i>         | 196.7±40.4 <sup>a</sup> | 516.2±12.2 <sup>bc</sup> |

Data are expressed as the mean ± SD. Different letters in the same column indicate significant difference ( $p < 0.05$ ) among different samples.



**Table S3.** The linear regression equations, linear regression coefficients ( $R^2$ ), limit of detection (LOD) and limit of quantification (LOQ) of lipid standards

| Standards          | Internal Standard      | Equations       | $R^2$ | LOD (ng/mL) | LOQ (ng/mL) |
|--------------------|------------------------|-----------------|-------|-------------|-------------|
| PC 17:0/17:0       | PC 15:0/18:1(d7)       | $y=15.37x+0.01$ | 0.996 | 2.09        | 6.89        |
| PG 17:0/17:0       | PG 15:0/18:1(d7)       | $y=106.5x-0.1$  | 0.997 | 1.19        | 3.93        |
| PE 17:0/17:0       | PE 15:0/18:1(d7)       | $y=105.1x+0.4$  | 0.995 | 0.30        | 0.99        |
| TAG 18:2/18:2/18:2 | TAG 15:0/18:1(d7)/15:0 | $y=0.92x+0.01$  | 0.999 | 2.28        | 7.52        |
| PI 8:0/8:0         | PI 15:0/18:1(d7)       | $y=1313.7x-1.5$ | 0.998 | 1.76        | 5.80        |
| SM d18:1/12:0      | SM d18:1/18:1(d9)      | $y=142.8x-1.3$  | 0.999 | 0.34        | 1.14        |
| PA 17:0/17:0       | PA 15:0/18:1(d7)       | $y=434.4x-3.0$  | 0.996 | 1.60        | 5.27        |

$x$  means the concentration (mg/mL) of lipid,  $y$  means the ratio of the peak area of lipid to the peak area of the internal standard.

**Table S4.** Molecular species of lipids extracted from muscles of five kinds of crabs

| Type               | Species   | <i>m/z</i> | <i>m/z</i> ref | ppm   | Concentrations (nmol/g) |                    |                    |                           |                   |
|--------------------|-----------|------------|----------------|-------|-------------------------|--------------------|--------------------|---------------------------|-------------------|
|                    |           |            |                |       | <i>P. camtschaticus</i> | <i>E. sinensis</i> | <i>C. magister</i> | <i>P. trituberculatus</i> | <i>C. pagurus</i> |
| LPC                |           |            |                |       |                         |                    |                    |                           |                   |
| [M+H] <sup>+</sup> | 16:0      | 496.3398   | 496.3398       | 0.00  | 147.2±12.6              | 117.8±4.57         | 85.69±2.64         | 83.09±4.25                | 44.77±4.32        |
| [M+H] <sup>+</sup> | 16:1      | 494.3242   | 494.3241       | 0.20  | 10.27±1.08              | 28.89±3.58         | 23.82±1.47         | 205.6±3.87                | 6.52±0.37         |
| [M+H] <sup>+</sup> | 18:1      | 522.3553   | 522.3554       | -0.19 | 177.6±10.1              | 223.5±10.3         | 142.5±7.1          | 1471±137                  | 103.1±5.1         |
| [M+H] <sup>+</sup> | 19:0      | 538.3873   | 538.3867       | 1.11  | nd                      | nd                 | 1.94±0.10          | 57.64±2.64                | nd                |
| [M+H] <sup>+</sup> | 20:1      | 550.3868   | 550.3867       | 0.18  | 11.34±0.00              | 2.29±0.18          | nd                 | 30.24±1.65                | nd                |
| [M+H] <sup>+</sup> | 20:2      | 548.3710   | 548.3711       | -0.18 | nd                      | 4.79±0.23          | 9.67±0.68          | 31.22±1.89                | nd                |
| [M+H] <sup>+</sup> | 20:5      | 542.3245   | 542.3241       | 0.74  | 110.7±2.2               | 60.65±5.68         | 79.76±7.04         | 504.1±40.4                | 60.25±5.88        |
| [M+H] <sup>+</sup> | 21:2      | 584.3712   | 584.3687       | 4.28  | nd                      | nd                 | 6.84±0.35          | 49.11±4.58                | 2.14±0.18         |
| [M+H] <sup>+</sup> | 21:5      | 556.3396   | 556.3398       | -0.36 | nd                      | 1.10±0.09          | 1.87±0.10          | 19.32±1.79                | 1.57±0.07         |
| [M+H] <sup>+</sup> | 22:6      | 568.3391   | 568.3398       | -1.23 | 61.78±1.40              | 149.5±14.2         | 42.80±3.67         | 481.3±48.2                | 28.20±2.35        |
| [M+H] <sup>+</sup> | O-15:0    | 468.3456   | 468.3449       | 1.49  | 1.47±0.10               | 2.06±0.05          | nd                 | 145.7±11.4                | nd                |
| [M+H] <sup>+</sup> | O-16:1    | 480.3448   | 480.3449       | -0.21 | 9.01±1.15               | nd                 | 17.34±1.13         | 47.88±1.73                | 3.28±0.26         |
| [M+H] <sup>+</sup> | O-16:4    | 474.2990   | 474.2979       | 2.32  | nd                      | 1.64±0.10          | 1.19±0.15          | 11.13±0.53                | nd                |
| [M+H] <sup>+</sup> | O-18:1    | 508.3768   | 508.3762       | 1.18  | nd                      | 5.25±0.26          | 11.26±0.84         | 120.3±12.5                | 1.23±0.13         |
| [M+H] <sup>+</sup> | O-20:2    | 534.3928   | 534.3918       | 1.87  | 1.36±0.12               | nd                 | nd                 | 3.36±0.38                 | nd                |
| PC                 |           |            |                |       |                         |                    |                    |                           |                   |
| [M+H] <sup>+</sup> | 15:1/20:5 | 764.5219   | 764.5225       | -0.78 | 1304±108                | 1043±56            | 233.5±18.3         | 71.81±3.80                | 542.3±42.7        |
| [M+H] <sup>+</sup> | 16:0/16:1 | 732.5544   | 732.5538       | 0.82  | 1134±111                | 255.7±21.6         | 1279±40            | 326.4±23.5                | 76.55±2.79        |
| [M+H] <sup>+</sup> | 16:0/20:5 | 780.5530   | 780.5538       | -1.02 | 2491±156                | 296.6±22.0         | 910.6±33.5         | 242.1±22.5                | 1325±68           |
| [M+H] <sup>+</sup> | 16:1/20:5 | 778.5377   | 778.5381       | -0.51 | 2.07±0.08               | 75.32±6.57         | 276.6±22.7         | 81.89±4.00                | 54.86±5.50        |
| [M+H] <sup>+</sup> | 16:4/22:5 | 800.5221   | 800.5225       | -0.50 | 104.2±9.6               | nd                 | 51.57±3.09         | nd                        | nd                |
| [M+H] <sup>+</sup> | 17:1/18:1 | 772.5858   | 772.5851       | 0.91  | 118.6±15.1              | 92.12±8.64         | 219.6±23.2         | 55.86±1.08                | 1.58±0.09         |
| [M+H] <sup>+</sup> | 17:1/22:6 | 818.5684   | 818.5694       | -1.22 | 277.3±12.0              | 37.62±4.62         | 131.9±11.4         | 74.15±4.00                | 55.93±5.06        |
| [M+H] <sup>+</sup> | 18:0/20:2 | 814.6309   | 814.6320       | -1.35 | 210.5±1.48              | nd                 | nd                 | nd                        | nd                |
| [M+H] <sup>+</sup> | 18:1/18:1 | 786.6015   | 786.6007       | 1.02  | 912.8±38.6              | 477.7±25.1         | 720.9±25.8         | 183.6±7.3                 | 188.3±10.2        |
| [M+H] <sup>+</sup> | 20:5/20:5 | 826.5369   | 826.5381       | -1.45 | 684.3±8.7               | nd                 | 392.0±18.6         | 98.51±7.65                | 878.9±75.1        |
| [M+H] <sup>+</sup> | 20:5/21:5 | 840.5532   | 840.5538       | -0.71 | 45.16±4.96              | 6.14±0.17          | 30.87±2.51         | nd                        | 54.93±2.43        |
| [M+H] <sup>+</sup> | 20:5/22:6 | 852.5530   | 852.5538       | -0.94 | 622.8±22.5              | 242.1±16.8         | 505.1±16.3         | 152.7±15.8                | 590.7±17.2        |

|                    |             |          |          |       |            |            |            |            |            |
|--------------------|-------------|----------|----------|-------|------------|------------|------------|------------|------------|
| [M+H] <sup>+</sup> | 21:5/22:6   | 866.5689 | 866.5694 | -0.58 | 24.57±0.32 | 9.86±0.78  | 18.83±1.46 | 3.88±0.12  | 18.64±1.58 |
| [M+H] <sup>+</sup> | 22:2/18:5   | 832.5856 | 832.5851 | 0.60  | 1441±78    | nd         | 832.3±46.9 | 127.5±12.3 | 361.9±8.0  |
| [M+H] <sup>+</sup> | 22:6/22:6   | 878.5695 | 878.5694 | 0.11  | 116.2±5.6  | 329.7±23.3 | 220.4±17.8 | 42.55±3.49 | 115.6±5.6  |
| LPE                |             |          |          |       |            |            |            |            |            |
| [M+H] <sup>+</sup> | 20:5        | 500.2772 | 500.2772 | 0.00  | 163.5±17.5 | 212.1±9.8  | 202.8±0.3  | 315.7±11.6 | 143.4±1.4  |
| [M+H] <sup>+</sup> | 22:6        | 526.2934 | 526.2928 | 1.14  | 33.56±3.05 | 217.1±15.1 | 17.17±1.66 | 528.4±8.5  | 22.65±2.06 |
| [M+H] <sup>+</sup> | O-17:1      | 452.3141 | 452.3136 | 1.11  | nd         | nd         | nd         | 103.4±0.2  | nd         |
| [M+H] <sup>+</sup> | O-18:1      | 466.3293 | 466.3292 | 0.21  | 52.35±2.02 | 105.4±13.5 | 123.4±11.5 | 1412±38    | 7.66±0.42  |
| PE                 |             |          |          |       |            |            |            |            |            |
| [M+H] <sup>+</sup> | 16:0/16:1   | 690.5065 | 690.5068 | -0.43 | 218.7±3.8  | 308.7±15.4 | 175.0±7.6  | 49.60±4.06 | 43.60±2.99 |
| [M+H] <sup>+</sup> | 16:0/18:1   | 718.5386 | 718.5381 | 0.70  | 163.1±5.6  | 1260±82    | 105.3±2.7  | 55.56±1.14 | 21.49±2.04 |
| [M+H] <sup>+</sup> | 16:0/18:2   | 716.5221 | 716.5225 | -0.56 | 71.76±3.88 | nd         | 19.97±1.56 | 30.52±2.97 | 21.34±1.87 |
| [M+H] <sup>+</sup> | 16:0/22:6   | 764.5239 | 764.5225 | 1.83  | 3034±80    | 8278±285   | 296.6±22.2 | nd         | 404.6±14.7 |
| [M+H] <sup>+</sup> | 16:1/18:1   | 716.5225 | 716.5225 | 0.00  | 103.8±6.0  | 872.8±6.9  | nd         | nd         | nd         |
| [M+H] <sup>+</sup> | 17:0/18:2   | 730.5381 | 730.5381 | 0.00  | 384.4±18.6 | 45.82±3.40 | 513.0±16.2 | 14.39±0.93 | 183.8±5.1  |
| [M+H] <sup>+</sup> | 18:0/18:2   | 744.5544 | 744.5538 | 0.81  | 134.6±10.1 | 706.9±19.1 | 180.7±19.1 | 36.84±1.47 | 84.62±5.16 |
| [M+H] <sup>+</sup> | 18:0/18:5   | 738.5065 | 738.5068 | -0.41 | 1006±60    | 729.7±4.1  | 605.7±37.8 | 33.51±1.48 | 927.1±8.3  |
| [M+H] <sup>+</sup> | 18:0/20:5   | 766.5386 | 766.5381 | 0.65  | 13.25±0.95 | 4968±144   | 1589±104   | 215.7±9.5  | 298.5±22.5 |
| [M+H] <sup>+</sup> | 18:1/22:6   | 790.5383 | 790.5381 | 0.25  | 889.3±14.1 | 1852±4     | 556.2±14.5 | 113.3±11.6 | 540.1±29.6 |
| [M+H] <sup>+</sup> | 22:6/22:6   | 836.5208 | 836.5225 | -2.03 | 69.66±5.49 | 1238±104   | 167.0±8.0  | 52.14±2.41 | 124.6±2.4  |
| [M+H] <sup>+</sup> | P-16:0/16:1 | 690.5079 | 690.5068 | 1.59  | 11.20±1.04 | nd         | 42.67±2.58 | 42.19±3.67 | nd         |
| [M+H] <sup>+</sup> | P-16:0/18:1 | 702.5435 | 702.5432 | 0.43  | 85.26±6.40 | 262.8±13.7 | 42.81±2.50 | 71.73±3.64 | 3.77±0.45  |
| [M+H] <sup>+</sup> | P-16:0/20:5 | 722.5123 | 722.5119 | 0.55  | 365.6±34.3 | 323.8±8.6  | 419.2±18.4 | 181.4±20.4 | 371.4±7.3  |
| [M+H] <sup>+</sup> | P-16:0/22:6 | 748.5275 | 748.5276 | -0.13 | 2609±154   | 755.8±58.5 | 1147±22    | 663.0±9.7  | 1531±43    |
| [M+H] <sup>+</sup> | P-17:0/20:5 | 736.5276 | 736.5276 | 0.00  | 133.1±4.6  | 379.9±18.1 | 292.3±18.1 | 155.4±12.4 | 122.9±11.0 |
| [M+H] <sup>+</sup> | P-17:0/22:6 | 762.5427 | 762.5432 | -0.66 | 213.2±12.2 | 1520±125   | 325.2±27.9 | 214.6±3.2  | 137.9±10.9 |
| [M+H] <sup>+</sup> | P-18:0/20:5 | 750.5430 | 750.5432 | -0.27 | 897.5±56.9 | 956.4±46.8 | 4156±70    | 2216±47    | 2649±175   |
| [M+H] <sup>+</sup> | P-18:0/22:6 | 776.5593 | 776.5589 | 0.52  | 250.9±7.4  | 1421±82    | 295.6±9.9  | 823.7±51.0 | 997.4±19.5 |
| [M+H] <sup>+</sup> | P-18:1/22:6 | 774.5424 | 774.5432 | -1.03 | 642.8±56.1 | 47.92±4.31 | 84.03±7.26 | 133.4±11.5 | 462.7±39.8 |
| [M+H] <sup>+</sup> | P-19:0/20:4 | 766.5734 | 766.5745 | -1.43 | nd         | 8.14±0.27  | 275.5±18.9 | 47.09±2.60 | 561.9±20.7 |
| [M+H] <sup>+</sup> | P-20:1/20:5 | 776.5576 | 776.5589 | -1.67 | 3183±317   | 116.5±14.0 | 615.4±24.6 | 977.4±52.4 | 620.8±39.2 |
| [M+H] <sup>+</sup> | P-20:1/22:6 | 802.5745 | 802.5745 | 0.00  | 283.0±24.7 | 750.4±47.7 | 22.48±2.76 | 16.43±0.80 | 56.83±6.10 |

TAG

|                                   |                     |          |          |       |            |            |            |            |            |
|-----------------------------------|---------------------|----------|----------|-------|------------|------------|------------|------------|------------|
| [M+NH <sub>4</sub> ] <sup>+</sup> | 14:0/16:0/18:1      | 822.7538 | 822.7545 | -0.85 | nd         | 624.2±29.6 | nd         | nd         | 95.59±6.43 |
| [M+NH <sub>4</sub> ] <sup>+</sup> | 16:0/16:1/18:1      | 848.7702 | 848.7678 | 2.83  | 1650±95    | 1144±114   | 61.29±3.62 | 1326±241   | 315.3±15.3 |
| [M+NH <sub>4</sub> ] <sup>+</sup> | 16:0/16:1/20:1      | 876.7996 | 876.8015 | -2.17 | 584.0±57.4 | 749.1±25.5 | 197.5±8.9  | nd         | nd         |
| [M+NH <sub>4</sub> ] <sup>+</sup> | 16:0/18:1/18:1      | 876.7993 | 876.8015 | -2.51 | 520.9±20.5 | 348.0±42.3 | 541.9±8.6  | 102.7±19.9 | 1041±58    |
| [M+NH <sub>4</sub> ] <sup>+</sup> | 16:0/18:1/20:1      | 904.8304 | 904.8328 | -2.65 | nd         | 1227±153   | 183.4±14.6 | 102.7±4.5  | nd         |
| [M+NH <sub>4</sub> ] <sup>+</sup> | 18:1/18:1/20:1      | 930.8484 | 930.8475 | 0.96  | 1215±174   | 80.37±5.06 | 76.26±6.06 | nd         | 154.8±13.0 |
| [M+NH <sub>4</sub> ] <sup>+</sup> | 18:1/18:1/20:5      | 922.7850 | 922.7858 | -0.87 | 2119±132   | 1909±159   | 677.8±25.0 | 62.41±2.85 | 520.9±25.6 |
| [M+NH <sub>4</sub> ] <sup>+</sup> | 18:2/18:2/18:2      | 896.7681 | 896.7702 | -2.34 | 924.8±25.1 | 252.8±15.4 | 71.45±7.06 | 394.7±18.6 | nd         |
| DAG                               |                     |          |          |       |            |            |            |            |            |
| [M+NH <sub>4</sub> ] <sup>+</sup> | 16:0/20:5           | 632.5250 | 632.5249 | 0.16  | 819.2±30.0 | 94.78±4.29 | 83.02±3.21 | nd         | nd         |
| [M+NH <sub>4</sub> ] <sup>+</sup> | 16:0/22:6           | 658.5405 | 658.5405 | 0.00  | nd         | 476.5±16.4 | nd         | nd         | nd         |
| [M+NH <sub>4</sub> ] <sup>+</sup> | 18:1/20:5           | 658.5404 | 658.5405 | -0.15 | 1415±131   | nd         | 225.9±18.7 | nd         | 144.3±5.6  |
| [M+NH <sub>4</sub> ] <sup>+</sup> | O-15:0/14:1         | 528.4987 | 528.4986 | 0.19  | 23.35±0.51 | 11.71±0.39 | 2.56±0.18  | 2.13±0.30  | nd         |
| [M+NH <sub>4</sub> ] <sup>+</sup> | O-15:0/16:1         | 556.5297 | 556.5299 | -0.36 | 68.22±4.76 | nd         | 17.11±0.56 | nd         | nd         |
| [M+NH <sub>4</sub> ] <sup>+</sup> | O-17:0/14:1         | 556.5299 | 556.5299 | 0.00  | nd         | 126.2±6.8  | 137.8±11.9 | 152.6±23.9 | 68.61±0.84 |
| SM                                |                     |          |          |       |            |            |            |            |            |
| [M+HCOO] <sup>-</sup>             | 12:1;2O/18:0        | 691.5034 | 691.5032 | 0.29  | 308.5±14.6 | 29.49±2.92 | 42.42±3.46 | 228.6±5.6  | 20.93±2.50 |
| [M+HCOO] <sup>-</sup>             | 12:1;2O/20:0        | 719.5349 | 719.5345 | 0.56  | 1231±117   | 299.2±12.6 | 530.1±22.9 | nd         | nd         |
| [M+HCOO] <sup>-</sup>             | 12:1;2O/24:1        | 773.5820 | 773.5814 | 0.78  | 588.0±41.8 | 6.83±0.57  | 153.7±7.7  | 55.86±5.56 | 94.47±0.85 |
| [M+HCOO] <sup>-</sup>             | 14:1;2O/18:0        | 719.5351 | 719.5345 | 0.83  | 1533±100   | 347.6±13.3 | nd         | 729.8±12.3 | 343.6±16.6 |
| [M+HCOO] <sup>-</sup>             | 14:1;2O/19:0        | 733.5509 | 733.5501 | 1.09  | 326.1±19.7 | 249.9±5.9  | 328.3±21.7 | 407.3±14.9 | 45.46±2.71 |
| [M+HCOO] <sup>-</sup>             | 14:1;2O/20:0        | 747.5664 | 747.5658 | 0.80  | 388.0±36.3 | 395.4±4.7  | 449.0±0.4  | 576.2±32.9 | 316.7±6.6  |
| [M+HCOO] <sup>-</sup>             | 14:1;2O/21:0        | 761.5818 | 761.5814 | 0.53  | nd         | 269.4±26.7 | 269.8±16.8 | 253.9±9.7  | 14.26±1.00 |
| [M+HCOO] <sup>-</sup>             | 14:1;2O/22:0        | 775.5978 | 775.5971 | 0.90  | nd         | 336.2±12.3 | 324.2±25.4 | 460.6±32.5 | 304.8±7.8  |
| [M+HCOO] <sup>-</sup>             | 14:1;2O/23:0        | 789.6135 | 789.6127 | 1.01  | nd         | 221.5±20.8 | 27.62±1.88 | 92.65±3.69 | 12.23±0.81 |
| [M+HCOO] <sup>-</sup>             | 14:1;2O/24:1        | 801.6134 | 801.6127 | 0.87  | 287.6±1.9  | 3.71±0.39  | 17.42±0.73 | 30.09±2.87 | 10.20±0.66 |
| [M+HCOO] <sup>-</sup>             | 16:1;2O/20:0        | 775.5980 | 775.5971 | 1.16  | nd         | nd         | nd         | 318.8±15.4 | nd         |
| CL                                |                     |          |          |       |            |            |            |            |            |
| [M-2H] <sup>2-</sup>              | 16:0/18:1/18:2/20:4 | 724.4863 | 724.4867 | -0.55 | 13.45±1.17 | nd         | nd         | 8.46±0.47  | 12.93±0.97 |
| [M-2H] <sup>2-</sup>              | 16:1/16:1/16:1/18:1 | 685.4632 | 685.4630 | 0.29  | nd         | nd         | 3.23±0.22  | 11.57±0.39 | nd         |
| [M-2H] <sup>2-</sup>              | 16:1/16:1/16:1/20:5 | 695.4482 | 695.4475 | 1.01  | nd         | nd         | 13.22±0.41 | 2.29±0.16  | nd         |
| [M-2H] <sup>2-</sup>              | 16:1/16:1/18:1/20:5 | 709.4633 | 709.4632 | 0.14  | 13.54±1.08 | 27.57±1.31 | 55.9±5.16  | 22.19±2.38 | 2.45±0.27  |
| [M-2H] <sup>2-</sup>              | 16:1/16:1/18:2/20:5 | 708.4554 | 708.4554 | 0.00  | nd         | 19.46±1.10 | 14.02±0.17 | 22.29±2.00 | 3.31±0.13  |

|                      |                     |          |          |       |            |            |            |            |             |
|----------------------|---------------------|----------|----------|-------|------------|------------|------------|------------|-------------|
| [M-2H] <sup>2-</sup> | 16:1/16:1/20:5/20:5 | 719.4473 | 719.4475 | -0.28 | 5.09±0.13  | 4.23±0.29  | 13.41±0.37 | nd         | nd          |
| [M-2H] <sup>2-</sup> | 16:1/16:1/20:5/22:6 | 732.4534 | 732.4554 | -2.73 | nd         | nd         | nd         | 4.77±0.50  | 12.17±1.10  |
| [M-2H] <sup>2-</sup> | 16:1/17:1/22:6/22:6 | 752.4707 | 752.4710 | -0.40 | nd         | nd         | 14.12±1.16 | nd         | 9.66±0.51   |
| [M-2H] <sup>2-</sup> | 16:1/18:1/18:1/18:2 | 712.4865 | 712.4867 | -0.28 | 2.29±0.16  | nd         | 14.71±1.08 | 13.40±1.24 | 8.61±0.14   |
| [M-2H] <sup>2-</sup> | 16:1/18:1/18:2/20:5 | 722.4714 | 722.4710 | 0.55  | 14.20±1.00 | nd         | 114.4±11.5 | nd         | 13.14±0.80  |
| [M-2H] <sup>2-</sup> | 16:1/18:1/20:3/20:5 | 735.4799 | 735.4788 | 1.50  | 15.41±0.73 | 89.34±3.80 | 103.7±8.4  | nd         | nd          |
| [M-2H] <sup>2-</sup> | 16:1/18:2/18:2/20:5 | 721.4626 | 721.4632 | -0.83 | 13.17±1.09 | 5.04±0.19  | 15.68±1.45 | nd         | 2.52±0.05   |
| [M-2H] <sup>2-</sup> | 16:1/18:2/20:5/20:5 | 732.4553 | 732.4554 | -0.14 | 4.46±0.09  | 8.22±0.31  | 16.61±0.11 | nd         | nd          |
| [M-2H] <sup>2-</sup> | 16:1/18:2/20:5/22:6 | 745.4640 | 745.4630 | 1.34  | 7.51±0.43  | 14.44±1.01 | nd         | 10.91±0.37 | nd          |
| [M-2H] <sup>2-</sup> | 16:1/18:2/22:6/22:6 | 758.4707 | 758.4710 | -0.40 | 8.72±0.23  | 16.47±0.78 | nd         | 10.74±0.36 | nd          |
| [M-2H] <sup>2-</sup> | 16:1/20:4/20:5/20:5 | 744.4543 | 744.4554 | -1.48 | 1.46±0.10  | nd         | 14.55±1.29 | nd         | 6.177±0.420 |
| [M-2H] <sup>2-</sup> | 16:1/20:5/20:5/20:5 | 743.4478 | 743.4475 | 0.40  | 1.06±0.05  | nd         | 13.77±1.17 | 2.47±0.32  | 1.32±0.05   |
| [M-2H] <sup>2-</sup> | 16:1/20:5/20:5/22:6 | 756.4555 | 756.4554 | 0.13  | 12.40±1.00 | nd         | 15.98±1.45 | nd         | 71.37±4.36  |
| [M-2H] <sup>2-</sup> | 16:1/20:5/22:6/22:6 | 769.4634 | 769.4632 | 0.26  | 7.05±0.17  | nd         | 16.43±0.36 | nd         | 12.06±0.47  |
| [M-2H] <sup>2-</sup> | 16:1/22:6/22:6/22:6 | 782.4715 | 782.4710 | 0.64  | 2.81±0.19  | nd         | 16.67±1.16 | nd         | 18.25±1.42  |
| [M-2H] <sup>2-</sup> | 18:0/18:1/20:3/22:6 | 763.5120 | 763.5101 | 2.49  | nd         | 24.92±0.29 | 233.0±15.3 | 42.69±3.02 | nd          |
| [M-2H] <sup>2-</sup> | 18:1/18:2/22:6/22:6 | 772.4867 | 772.4867 | 0.00  | nd         | 10.23±0.60 | nd         | 10.32±0.35 | 205.1±10.7  |
| [M-2H] <sup>2-</sup> | 18:1/20:5/22:6/22:6 | 783.4789 | 783.4788 | 0.13  | 13.01±1.19 | nd         | 119.2±5.2  | nd         | 186.6±10.0  |
| [M-2H] <sup>2-</sup> | 18:2/18:2/18:3/20:3 | 735.4791 | 735.4788 | 0.41  | 14.55±1.02 | 16.4±0.11  | nd         | 58.47±3.57 | nd          |
| [M-2H] <sup>2-</sup> | 18:2/18:3/18:3/18:3 | 720.4562 | 720.4554 | 1.11  | nd         | 11.71±0.75 | nd         | 6.66±0.21  | 2.21±0.13   |
| [M-2H] <sup>2-</sup> | 18:2/18:3/18:3/20:5 | 732.4560 | 732.4554 | 0.82  | nd         | 10.51±0.96 | nd         | nd         | nd          |
| [M-2H] <sup>2-</sup> | 18:2/18:3/18:3/22:6 | 745.4635 | 745.4632 | 0.40  | 3.24±0.18  | 10.53±0.24 | 132.2±10.0 | nd         | 42.94±2.50  |
| [M-2H] <sup>2-</sup> | 18:2/18:3/20:5/20:5 | 744.4555 | 744.4554 | 0.13  | nd         | 10.18±0.94 | nd         | nd         | 4.36±0.14   |
| [M-2H] <sup>2-</sup> | 18:2/18:3/22:6/22:6 | 770.4711 | 770.4710 | 0.13  | 9.56±0.30  | 10.59±0.59 | 123.6±10.2 | 3.02±0.15  | 45.39±3.04  |
| [M-2H] <sup>2-</sup> | 18:2/20:5/22:6/22:6 | 782.4716 | 782.4710 | 0.77  | 4.61±0.27  | nd         | nd         | nd         | 14.01±1.21  |
| [M-2H] <sup>2-</sup> | 18:2/22:6/22:6/22:6 | 795.4786 | 795.4788 | -0.25 | nd         | nd         | 13.16±1.08 | nd         | 11.93±1.14  |
| [M-2H] <sup>2-</sup> | 20:5/22:6/22:6/22:6 | 806.4725 | 806.4710 | 1.86  | nd         | nd         | 11.89±1.17 | nd         | 1.56±0.05   |

LPG

|                    |      |          |          |      |    |    |    |            |    |
|--------------------|------|----------|----------|------|----|----|----|------------|----|
| [M-H] <sup>-</sup> | 16:1 | 481.2573 | 481.2572 | 0.21 | nd | nd | nd | 17.77±1.12 | nd |
| [M-H] <sup>-</sup> | 18:1 | 509.2886 | 509.2885 | 0.20 | nd | nd | nd | 20.40±0.79 | nd |
| [M-H] <sup>-</sup> | 18:2 | 507.2733 | 507.2728 | 0.99 | nd | nd | nd | 15.97±0.46 | nd |
| [M-H] <sup>-</sup> | 20:2 | 535.3046 | 535.3041 | 0.93 | nd | nd | nd | 17.11±0.51 | nd |
| [M-H] <sup>-</sup> | 20:4 | 531.2732 | 531.2728 | 0.75 | nd | nd | nd | 15.18±0.14 | nd |

|                    |           |          |          |       |            |            |            |            |            |
|--------------------|-----------|----------|----------|-------|------------|------------|------------|------------|------------|
| [M-H] <sup>-</sup> | 20:5      | 529.2571 | 529.2572 | -0.19 | nd         | nd         | nd         | 15.90±0.56 | nd         |
| [M-H] <sup>-</sup> | 22:6      | 555.2730 | 555.2728 | 0.36  | nd         | nd         | nd         | 17.67±0.44 | nd         |
| PG                 |           |          |          |       |            |            |            |            |            |
| [M-H] <sup>-</sup> | 16:0/18:1 | 747.5187 | 747.5182 | 0.67  | 18.19±0.10 | 13.82±0.08 | 16.13±1.31 | 12.41±0.32 | 13.92±0.85 |
| [M-H] <sup>-</sup> | 16:0/19:1 | 761.5337 | 761.5338 | -0.13 | nd         | 10.09±0.77 | 12.92±1.08 | 2.05±0.05  | 11.37±1.07 |
| [M-H] <sup>-</sup> | 16:0/19:2 | 759.5187 | 759.5182 | 0.66  | nd         | 1.38±0.14  | 2.52±0.03  | 10.61±0.36 | 3.74±0.26  |
| [M-H] <sup>-</sup> | 16:0/20:2 | 773.5341 | 773.5338 | 0.39  | 14.28±1.38 | 27.79±1.33 | 22.22±1.78 | 15.89±0.83 | 26.79±2.59 |
| [M-H] <sup>-</sup> | 16:0/20:3 | 771.5187 | 771.5182 | 0.65  | 1.51±0.14  | 15.09±0.10 | 29.93±1.46 | 13.19±0.65 | 12.38±0.94 |
| [M-H] <sup>-</sup> | 16:0/20:4 | 769.5029 | 769.5025 | 0.52  | 4.81±0.22  | 5.28±0.31  | 14.24±1.06 | 17.73±1.10 | 13.28±0.85 |
| [M-H] <sup>-</sup> | 16:0/20:5 | 767.4871 | 767.4869 | 0.26  | 15.09±1.45 | 3.43±0.14  | 12.83±1.18 | 10.51±1.01 | 13.77±0.84 |
| [M-H] <sup>-</sup> | 16:0/22:6 | 793.5032 | 793.5025 | 0.88  | 15.03±1.26 | 9.73±0.67  | 12.80±1.05 | nd         | 12.33±0.91 |
| [M-H] <sup>-</sup> | 16:1/16:1 | 717.4720 | 717.4712 | 1.12  | nd         | nd         | 1.41±0.04  | 12.48±0.45 | nd         |
| [M-H] <sup>-</sup> | 16:1/18:1 | 745.5027 | 745.5025 | 0.27  | 13.04±1.07 | 10.94±1.02 | 13.19±1.07 | 13.63±0.56 | 5.57±0.30  |
| [M-H] <sup>-</sup> | 16:1/20:5 | 765.4717 | 765.4712 | 0.65  | 1.21±0.16  | nd         | 11.43±1.05 | 10.91±0.34 | 5.14±0.11  |
| [M-H] <sup>-</sup> | 16:1/22:6 | 791.4872 | 791.4869 | 0.38  | 1.62±0.10  | nd         | 12.43±1.01 | 12.61±0.35 | 11.04±1.03 |
| [M-H] <sup>-</sup> | 17:0/20:2 | 787.5496 | 787.5495 | 0.13  | nd         | 2.13±0.13  | 12.32±1.04 | 10.11±0.35 | 10.92±1.00 |
| [M-H] <sup>-</sup> | 17:0/20:5 | 781.5035 | 781.5025 | 1.28  | 1.23±0.13  | nd         | nd         | nd         | 11.04±1.07 |
| [M-H] <sup>-</sup> | 17:0/22:6 | 807.5181 | 807.5182 | -0.12 | nd         | nd         | nd         | nd         | 10.56±1.01 |
| [M-H] <sup>-</sup> | 18:0/20:5 | 795.5192 | 795.5182 | 1.26  | nd         | 2.31±0.14  | 22.17±1.63 | 10.73±0.58 | 12.19±0.86 |
| [M-H] <sup>-</sup> | 18:0/22:6 | 821.5347 | 821.5338 | 1.10  | nd         | 9.34±0.71  | 2.32±0.16  | nd         | nd         |
| [M-H] <sup>-</sup> | 18:1/22:6 | 819.5188 | 819.5182 | 0.73  | 12.18±1.19 | nd         | 11.77±0.94 | 1.15±0.10  | 11.17±0.94 |
| [M-H] <sup>-</sup> | 18:2/22:6 | 817.5035 | 817.5025 | 1.22  | nd         | nd         | 2.18±0.17  | 10.48±0.31 | 2.87±0.12  |
| [M-H] <sup>-</sup> | 20:2/22:6 | 845.5349 | 845.5338 | 1.30  | nd         | nd         | 1.89±0.08  | 9.23±0.30  | 10.16±0.96 |
| [M-H] <sup>-</sup> | 22:6/22:6 | 865.5035 | 865.5025 | 1.16  | nd         | nd         | nd         | 9.13±0.26  | 9.94±0.85  |
| LPA                |           |          |          |       |            |            |            |            |            |
| [M-H] <sup>-</sup> | 16:0      | 409.2363 | 409.2361 | 0.49  | 138.9±17.6 | 40.92±1.76 | 57.29±2.73 | 315.8±12.5 | 58.49±2.01 |
| [M-H] <sup>-</sup> | 18:3      | 431.2205 | 431.2204 | 0.23  | 277.7±11.5 | 79.99±4.55 | 140.1±9.6  | 335.9±0.3  | 66.52±2.02 |
| PA                 |           |          |          |       |            |            |            |            |            |
| [M-H] <sup>-</sup> | 14:0/18:1 | 645.4506 | 645.4501 | 0.77  | 149.7±11.3 | nd         | nd         | nd         | nd         |
| [M-H] <sup>-</sup> | 15:0/18:1 | 659.4661 | 659.4657 | 0.61  | 140.0±11.3 | 7.27±0.24  | 46.93±3.49 | nd         | nd         |
| [M-H] <sup>-</sup> | 16:0/16:1 | 645.4501 | 645.4501 | 0.00  | 146.6±9.9  | 118.1±9.1  | 182.6±3.9  | nd         | nd         |
| [M-H] <sup>-</sup> | 16:0/18:1 | 673.4817 | 673.4814 | 0.45  | 168.3±3.9  | 132.2±6.3  | 198.1±5.1  | nd         | 234.9±27.4 |
| [M-H] <sup>-</sup> | 16:0/18:3 | 669.4509 | 669.4501 | 1.20  | 7.79±0.53  | 111.4±10.6 | 13.18±0.62 | nd         | nd         |

|                    |           |          |          |       |            |            |            |            |            |
|--------------------|-----------|----------|----------|-------|------------|------------|------------|------------|------------|
| [M-H] <sup>-</sup> | 16:0/20:5 | 693.4504 | 693.4501 | 0.43  | 157.7±12.6 | 128.7±9.4  | 232.2±14.2 | 57.37±1.26 | 192.3±12.2 |
| [M-H] <sup>-</sup> | 16:0/22:6 | 719.4657 | 719.4657 | 0.00  | 4250±142   | nd         | nd         | 164.6±4.6  | nd         |
| [M-H] <sup>-</sup> | 16:1/16:1 | 643.4348 | 643.4344 | 0.62  | nd         | nd         | 148.1±11.5 | nd         | nd         |
| [M-H] <sup>-</sup> | 16:1/18:1 | 671.4663 | 671.4657 | 0.89  | 148.0±8.6  | 124.9±7.9  | 165.1±4.6  | nd         | 8.31±0.90  |
| [M-H] <sup>-</sup> | 16:1/20:5 | 691.4348 | 691.4344 | 0.58  | 144.4±6.4  | 20.38±0.62 | 164.6±12.2 | nd         | 15.93±1.25 |
| [M-H] <sup>-</sup> | 16:1/22:6 | 717.4506 | 717.4501 | 0.70  | 147.4±10.2 | nd         | 155.4±2.7  | 4.58±0.47  | 12.99±0.87 |
| [M-H] <sup>-</sup> | 17:0/18:1 | 687.4981 | 687.4970 | 1.60  | 133.4±10.4 | 6.65±0.40  | 16.83±1.10 | nd         | nd         |
| [M-H] <sup>-</sup> | 17:0/20:4 | 709.4822 | 709.4814 | 1.13  | nd         | 105.5±8.2  | nd         | nd         | nd         |
| [M-H] <sup>-</sup> | 17:0/20:5 | 707.4666 | 707.4657 | 1.27  | 153.2±9.0  | 12.53±0.75 | 142.6±12.5 | 4.69±0.38  | 178.0±17.2 |
| [M-H] <sup>-</sup> | 17:0/22:6 | 733.4818 | 733.4814 | 0.55  | 161.3±15.5 | 105.0±9.2  | nd         | nd         | nd         |
| [M-H] <sup>-</sup> | 17:1/18:1 | 685.4813 | 685.4814 | -0.15 | 133.7±10.4 | 109.5±8.5  | 141.1±9.2  | nd         | nd         |
| [M-H] <sup>-</sup> | 17:1/20:5 | 705.4510 | 705.4501 | 1.28  | 48.19±2.54 | nd         | 142.4±6.2  | nd         | nd         |
| [M-H] <sup>-</sup> | 17:1/22:6 | 731.4666 | 731.4657 | 1.23  | 54.27±3.72 | 13.16±1.03 | 137.7±9.2  | nd         | nd         |
| [M-H] <sup>-</sup> | 18:0/20:4 | 723.4980 | 723.4970 | 1.38  | nd         | 58.21±4.34 | nd         | nd         | 173.8±14.6 |
| [M-H] <sup>-</sup> | 18:0/20:5 | 721.4821 | 721.4814 | 0.97  | 1670±34    | 3.79±0.16  | nd         | 168.0±3.7  | 170.0±8.6  |
| [M-H] <sup>-</sup> | 18:1/18:1 | 699.4976 | 699.4970 | 0.86  | 144.4±9.2  | 117.5±9.7  | 149.5±12.3 | 11.47±0.80 | 8.75±0.29  |
| [M-H] <sup>-</sup> | 18:1/18:2 | 697.4824 | 697.4814 | 1.43  | 11.64±0.52 | 112.6±8.7  | 22.53±1.61 | nd         | nd         |
| [M-H] <sup>-</sup> | 18:1/20:1 | 727.5293 | 727.5283 | 1.37  | 126.5±8.6  | 103.5±9.2  | 10.88±1.13 | nd         | nd         |
| [M-H] <sup>-</sup> | 18:1/20:5 | 719.4662 | 719.4657 | 0.69  | 290.7±28.6 | 169.5±12.9 | 257.7±16.8 | nd         | 220.6±0.0  |
| [M-H] <sup>-</sup> | 18:1/22:6 | 745.4819 | 745.4814 | 0.67  | 230.8±20.2 | 179.0±4.5  | 193.2±7.9  | nd         | 179.3±17.4 |
| [M-H] <sup>-</sup> | 18:2/20:5 | 717.4507 | 717.4501 | 0.84  | nd         | 116.6±11.3 | nd         | nd         | 24.55±1.17 |
| [M-H] <sup>-</sup> | 18:2/22:6 | 743.4667 | 743.4657 | 1.35  | 125.9±10.1 | 124.6±4.3  | nd         | nd         | 3.61±0.33  |
| [M-H] <sup>-</sup> | 18:3/20:5 | 715.4353 | 715.4344 | 1.26  | nd         | 108.1±7.5  | nd         | nd         | nd         |
| [M-H] <sup>-</sup> | 18:3/22:6 | 741.4509 | 741.4501 | 1.08  | 84.00±6.97 | 113.4±3.9  | nd         | nd         | 4.58±0.40  |
| [M-H] <sup>-</sup> | 19:1/20:5 | 733.4822 | 733.4814 | 1.09  | 135.0±8.8  | nd         | 141.1±13.8 | 23.08±1.64 | 17.73±1.08 |
| [M-H] <sup>-</sup> | 19:1/22:6 | 759.4978 | 759.4970 | 1.05  | 120.9±9.5  | nd         | 126.5±9.8  | 31.07±1.37 | nd         |
| [M-H] <sup>-</sup> | 20:1/22:6 | 773.5134 | 773.5127 | 0.90  | 121.5±8.8  | nd         | 52.36±3.96 | nd         | nd         |
| [M-H] <sup>-</sup> | 20:3/20:5 | 743.4667 | 743.4657 | 1.35  | nd         | nd         | 139.1±6.1  | nd         | nd         |
| [M-H] <sup>-</sup> | 20:5/20:5 | 739.4349 | 739.4344 | 0.68  | 131.9±10.7 | 108.8±7.8  | 168.4±9.6  | 10.82±1.06 | 174.7±11.5 |
| [M-H] <sup>-</sup> | 20:5/21:5 | 753.4508 | 753.4501 | 0.93  | nd         | nd         | 124.7±9.6  | nd         | 108.2±2.0  |
| [M-H] <sup>-</sup> | 20:5/22:6 | 765.4503 | 765.4501 | 0.26  | 131.0±8.8  | 125.2±9.6  | 159.9±13.1 | 51.02±2.82 | 167.1±13.9 |
| [M-H] <sup>-</sup> | 22:6/22:6 | 791.4665 | 791.4657 | 1.01  | nd         | 105.2±9.5  | 121.1±9.3  | nd         | nd         |

LPI

|                    |             |          |          |       |            |            |            |            |            |
|--------------------|-------------|----------|----------|-------|------------|------------|------------|------------|------------|
| [M-H] <sup>-</sup> | 20:5        | 617.2732 | 617.2732 | 0.00  | 2.81±0.16  | 28.82±1.14 | 1.12±0.12  | 30.66±1.49 | 3.06±0.20  |
|                    |             |          |          |       | PI         |            |            |            |            |
| [M-H] <sup>-</sup> | 15:0/20:5   | 841.4877 | 841.4873 | 0.48  | 27.79±2.22 | nd         | 28.64±2.35 | nd         | nd         |
| [M-H] <sup>-</sup> | 16:0/18:1   | 835.5349 | 835.5342 | 0.84  | nd         | 21.38±0.87 | nd         | 21.52±1.51 | nd         |
| [M-H] <sup>-</sup> | 16:0/20:5   | 855.5034 | 855.5029 | 0.58  | 123.1±2.5  | 64.13±4.96 | 73.98±5.61 | 31.95±2.81 | 91.64±0.70 |
| [M-H] <sup>-</sup> | 16:1/20:5   | 853.4872 | 853.4873 | -0.12 | 28.72±2.59 | 22.55±1.85 | 29.51±2.45 | 21.17±1.56 | 28.03±1.36 |
| [M-H] <sup>-</sup> | 17:0/20:5   | 869.5190 | 869.5186 | 0.46  | 41.43±3.58 | 32.30±1.69 | 45.74±4.03 | 24.84±2.34 | 48.25±0.14 |
| [M-H] <sup>-</sup> | 17:1/20:5   | 867.5034 | 867.5029 | 0.58  | 28.00±2.47 | 22.24±1.73 | 28.78±2.17 | 7.67±0.18  | 26.63±0.59 |
| [M-H] <sup>-</sup> | 18:0/18:1   | 863.5665 | 863.5655 | 1.16  | nd         | nd         | 1.1±0.080  | 20.73±1.41 | 1.19±0.14  |
| [M-H] <sup>-</sup> | 18:0/20:5   | 883.5341 | 883.5342 | -0.11 | nd         | 178.2±16.1 | 231.0±24.0 | 62.03±7.77 | 278.3±3.0  |
| [M-H] <sup>-</sup> | 18:0/22:6   | 909.5510 | 909.5499 | 1.21  | nd         | nd         | nd         | 20.03±1.38 | nd         |
| [M-H] <sup>-</sup> | 18:1/20:5   | 881.5190 | 881.5186 | 0.45  | 159.1±15.6 | 53.09±4.33 | 86.57±6.84 | 25.17±1.69 | 98.59±0.86 |
| [M-H] <sup>-</sup> | 18:2/20:5   | 879.5033 | 879.5029 | 0.45  | 27.52±1.74 | 24.99±2.18 | 28.83±2.80 | 20.51±1.40 | 27.63±0.46 |
| [M-H] <sup>-</sup> | 18:3/20:5   | 877.4881 | 877.4873 | 0.91  | 3.03±0.14  | 21.88±2.15 | nd         | nd         | nd         |
| [M-H] <sup>-</sup> | 19:0/20:5   | 897.5502 | 897.5499 | 0.33  | 44.39±4.00 | 22.73±1.15 | nd         | 20.17±1.35 | nd         |
| [M-H] <sup>-</sup> | 19:1/20:5   | 895.5341 | 895.5342 | -0.11 | 28.54±1.73 | 22.08±1.70 | 26.16±1.12 | 20.17±1.41 | 27.16±0.54 |
| [M-H] <sup>-</sup> | 20:1/20:5   | 909.5509 | 909.5499 | 1.10  | nd         | nd         | nd         | nd         | 26.68±0.68 |
| [M-H] <sup>-</sup> | 20:2/20:5   | 907.5345 | 907.5342 | 0.33  | 28.24±2.20 | 62.03±4.51 | 29.55±0.15 | 19.89±1.33 | 28.04±0.43 |
| [M-H] <sup>-</sup> | 20:4/20:5   | 903.5040 | 903.5029 | 1.22  | nd         | 21.43±1.66 | 12.28±1.34 | nd         | nd         |
| [M-H] <sup>-</sup> | 20:5/20:5   | 901.4875 | 901.4873 | 0.22  | 26.81±2.40 | 21.61±1.75 | 27.96±2.71 | 20.29±1.47 | 26.52±0.68 |
| [M-H] <sup>-</sup> | 20:5/22:5   | 929.5186 | 929.5186 | 0.00  | 1.78±0.16  | 13.69±1.24 | 25.96±2.12 | nd         | 24.68±0.49 |
| [M-H] <sup>-</sup> | 20:5/22:6   | 927.5034 | 927.5029 | 0.54  | 25.37±1.98 | 21.36±1.65 | 26.16±2.24 | 19.24±1.33 | 24.56±0.46 |
| [M-H] <sup>-</sup> | 20:4/18:2;O | 897.5137 | 897.5135 | 0.22  | 25.96±2.02 | 70.16±5.86 | nd         | 21.61±2.03 | nd         |

nd: not detected



**Table S5.** Molecular species of lipids extracted from edible viscera of five kinds of crabs

| Type               | Species   | m/z      | m/z ref  | ppm   | Concentrations (nmol/g) |                    |                    |                           |                   |
|--------------------|-----------|----------|----------|-------|-------------------------|--------------------|--------------------|---------------------------|-------------------|
|                    |           |          |          |       | <i>P. camtschaticus</i> | <i>E. sinensis</i> | <i>C. magister</i> | <i>P. trituberculatus</i> | <i>C. pagurus</i> |
| LPC                |           |          |          |       |                         |                    |                    |                           |                   |
| [M+H] <sup>+</sup> | 16:0      | 496.3400 | 496.3398 | 0.40  | 67.19±3.01              | 8.92±0.45          | 290.9±7.9          | 436.4±4.2                 | 175.6±4.1         |
| [M+H] <sup>+</sup> | 16:1      | 494.3240 | 494.3241 | -0.20 | 23.35±0.71              | 6.09±0.2           | 314.1±11.0         | 22.33±1.73                | 81.24±2.50        |
| [M+H] <sup>+</sup> | 18:1      | 522.3554 | 522.3554 | 0.00  | 269.3±9.7               | 19.41±1.88         | 1040±41            | 1217±42                   | 276.1±2.9         |
| [M+H] <sup>+</sup> | 20:1      | 550.3868 | 550.3867 | 0.18  | 18.99±1.14              | nd                 | 38.07±3.27         | 29.45±0.69                | 16.68±0.98        |
| [M+H] <sup>+</sup> | 20:4      | 544.3400 | 544.3398 | 0.37  | nd                      | nd                 | nd                 | 202.0±8.2                 | nd                |
| [M+H] <sup>+</sup> | 20:5      | 542.3243 | 542.3241 | 0.37  | 67.51±5.45              | 4.16±0.18          | 684.7±31.8         | 305.9±23.4                | 321.4±16.2        |
| [M+H] <sup>+</sup> | 22:6      | 568.3392 | 568.3398 | -1.06 | 32.01±3.65              | 6.73±0.38          | 459.2±27.7         | 393.0±28.5                | 210.4±14.5        |
| [M+H] <sup>+</sup> | O-15:0    | 468.3452 | 468.3449 | 0.64  | 5.14±0.22               | nd                 | 8.26±0.31          | 23.48±0.74                | 12.56±0.95        |
| [M+H] <sup>+</sup> | O-16:1    | 480.3449 | 480.3449 | 0.00  | 26.70±2.09              | 1.80±0.09          | nd                 | 43.14±1.06                | 23.18±0.65        |
| [M+H] <sup>+</sup> | O-18:1    | 508.3765 | 508.3762 | 0.59  | 6.54±0.40               | nd                 | 16.65±0.71         | 131.7±3.4                 | 20.33±2.85        |
| PC                 |           |          |          |       |                         |                    |                    |                           |                   |
| [M+H] <sup>+</sup> | 13:0/20:5 | 738.5074 | 738.5068 | 0.81  | 383.7±11.3              | 2.81±0.19          | 230.0±17.0         | 115.5±11.6                | 121.5±6.5         |
| [M+H] <sup>+</sup> | 15:0/18:1 | 746.5692 | 746.5694 | -0.27 | 136.6±2.5               | 30.10±1.03         | 740.6±14.8         | 294.7±10.5                | 459.2±37.8        |
| [M+H] <sup>+</sup> | 15:0/20:1 | 774.6006 | 774.6007 | -0.13 | 129.2±10.1              | 3.47±0.48          | 515.1±20.4         | 31.98±4.26                | 173.1±14.1        |
| [M+H] <sup>+</sup> | 15:1/18:1 | 744.5541 | 744.5538 | 0.40  | 30.67±3.45              | 26.18±2.07         | 279.5±23.4         | 393.7±16.0                | 150.8±10.9        |
| [M+H] <sup>+</sup> | 15:1/20:5 | 764.5228 | 764.5225 | 0.39  | 549.9±13.2              | 11.15±1.71         | 966.9±51.2         | 314.1±17.8                | 208.9±4.7         |
| [M+H] <sup>+</sup> | 16:0/20:5 | 780.5537 | 780.5538 | -0.13 | 1368±56                 | 127.0±5.7          | 2691±210           | 118.6±15.3                | 1874±53           |
| [M+H] <sup>+</sup> | 16:1/16:1 | 730.5378 | 730.5381 | -0.41 | nd                      | 55.55±3.47         | nd                 | 115.4±5.4                 | 2.51±0.42         |
| [M+H] <sup>+</sup> | 16:1/18:1 | 758.5687 | 758.5694 | -0.92 | nd                      | 534.1±5.7          | 6490±260           | nd                        | nd                |
| [M+H] <sup>+</sup> | 16:1/20:5 | 778.5375 | 778.5381 | -0.77 | nd                      | 48.16±2.50         | 1272±79            | 148.4±9.7                 | 123.9±7.4         |
| [M+H] <sup>+</sup> | 17:1/18:1 | 772.5850 | 772.5851 | -0.13 | 115.9±5.4               | 38.23±1.98         | 449.1±24.6         | 62.78±2.91                | 119.0±8.7         |
| [M+H] <sup>+</sup> | 17:1/20:5 | 792.5549 | 792.5538 | 1.39  | 485.8±24.9              | 86.52±6.53         | 2191±187           | 565.0±10.8                | 104.9±8.4         |
| [M+H] <sup>+</sup> | 18:0/20:2 | 814.6321 | 814.6320 | 0.12  | 262.7±3.4               | nd                 | nd                 | 14.29±1.70                | nd                |
| [M+H] <sup>+</sup> | 18:0/22:2 | 842.6617 | 842.6633 | -1.90 | 13.16±0.69              | nd                 | 61.62±2.44         | nd                        | nd                |
| [M+H] <sup>+</sup> | 18:1/18:1 | 786.6014 | 786.6007 | 0.89  | 1086±65                 | 258.3±19.1         | 5279±514           | 13.02±1.68                | 470.6±12.1        |
| [M+H] <sup>+</sup> | 19:0/18:2 | 800.6158 | 800.6164 | -0.75 | 17.89±2.11              | 13.01±1.61         | 151.6±10.4         | 3.81±0.16                 | 8.53±0.41         |
| [M+H] <sup>+</sup> | 20:5/20:5 | 826.5370 | 826.5381 | -1.33 | 56.01±5.13              | nd                 | nd                 | 29.99±1.99                | 115.6±1.9         |
| [M+H] <sup>+</sup> | 20:5/22:6 | 852.5522 | 852.5538 | -1.88 | 55.81±3.10              | 18.66±1.51         | 144.3±2.4          | 28.74±2.05                | 114.6±0.8         |

|                                   |                |          |          |       |            |            |            |            |            |
|-----------------------------------|----------------|----------|----------|-------|------------|------------|------------|------------|------------|
| [M+H] <sup>+</sup>                | 22:2/18:5      | 832.5854 | 832.5851 | 0.36  | 1142±63    | 182.1±18.4 | 3047±80    | nd         | 690.0±57.1 |
| [M+H] <sup>+</sup>                | 22:6/22:6      | 878.5698 | 878.5694 | 0.46  | 18.39±1.02 | 15.56±1.25 | 51.20±5.31 | nd         | 40.60±2.76 |
| LPE                               |                |          |          |       |            |            |            |            |            |
| [M+H] <sup>+</sup>                | 20:5           | 500.2779 | 500.2772 | 1.40  | 100.6±5.2  | 15.79±0.99 | 448.2±14.1 | 86.53±2.76 | 157.5±13.2 |
| [M+H] <sup>+</sup>                | 22:6           | 526.2932 | 526.2928 | 0.76  | 44.73±3.81 | 14.77±0.98 | 286.4±26.1 | 85.67±4.38 | 115.8±9.4  |
| [M+H] <sup>+</sup>                | O-18:1         | 466.3291 | 466.3292 | -0.21 | 144.0±11.2 | nd         | 176.6±10.2 | 193.3±10.8 | 105.8±7.4  |
| [M+H] <sup>+</sup>                | 16:0/16:1      | 690.5061 | 690.5068 | -1.01 | 69.36±3.48 | 32.45±2.15 | 198.4±9.3  | 10.49±0.71 | 60.90±3.06 |
| [M+H] <sup>+</sup>                | 16:0/18:2      | 716.5218 | 716.5225 | -0.98 | 76.25±7.00 | 116.3±9.0  | 215.3±23.6 | 19.22±1.80 | 45.09±3.56 |
| [M+H] <sup>+</sup>                | 18:0/18:5      | 738.5074 | 738.5068 | 0.81  | 316.2±31.9 | 135.6±12.4 | 1176±99    | nd         | 482.9±10.5 |
| [M+H] <sup>+</sup>                | 18:0/20:5      | 766.5381 | 766.5381 | 0.00  | 8.33±0.66  | 84.43±0.64 | 1394±20    | 64.68±3.93 | 367.8±19.1 |
| [M+H] <sup>+</sup>                | 18:1/20:5      | 764.5212 | 764.5225 | -1.70 | 2080±50    | 461.5±25.0 | 808.1±57.0 | 54.86±4.53 | 917.7±16.9 |
| [M+H] <sup>+</sup>                | 20:1/22:6      | 818.5682 | 818.5694 | -1.47 | 32.39±3.53 | nd         | 90.57±5.70 | nd         | nd         |
| [M+H] <sup>+</sup>                | 20:2/20:2      | 796.5840 | 796.5851 | -1.38 | nd         | 20.68±1.80 | 267.4±18.5 | 7.14±0.31  | nd         |
| [M+H] <sup>+</sup>                | 20:2/20:5      | 790.5378 | 790.5381 | -0.38 | 579.4±21.2 | 183.9±8.7  | 256.9±14.3 | 14.84±1.34 | 320.5±17.8 |
| [M+H] <sup>+</sup>                | P-16:0/20:5    | 722.5120 | 722.5119 | 0.14  | 1001±49    | 176.5±11.2 | 839.6±26.8 | 164.3±5.6  | 63.38±4.75 |
| [M+H] <sup>+</sup>                | P-16:0/22:6    | 748.5275 | 748.5276 | -0.13 | nd         | 154.9±6.1  | 3069±258   | 572.5±0.5  | 1389±91    |
| [M+H] <sup>+</sup>                | P-17:0/22:6    | 762.5427 | 762.5432 | -0.66 | 155.1±3.9  | 128.2±9.7  | 1268±7     | 244.2±8.6  | 118.3±3.3  |
| [M+H] <sup>+</sup>                | P-18:0/20:5    | 750.5439 | 750.5432 | 0.93  | 3329±121   | 368.8±17.3 | 7243±215   | 1221±14    | 3156±131   |
| [M+H] <sup>+</sup>                | P-18:0/22:6    | 776.5593 | 776.5589 | 0.52  | 1621±54    | 447.9±33.6 | 10250±677  | 1227±39    | 1818±96    |
| [M+H] <sup>+</sup>                | P-18:1/22:6    | 774.5438 | 774.5432 | 0.77  | 218.0±19.0 | 66.47±3.01 | 2263±29    | 337.7±28.5 | 616.0±2.5  |
| [M+H] <sup>+</sup>                | P-19:0/22:6    | 790.5745 | 790.5745 | 0.00  | 22.81±2.36 | nd         | 152.2±13.6 | 42.67±5.31 | 54.42±3.46 |
| [M+H] <sup>+</sup>                | P-20:1/22:6    | 802.5746 | 802.5745 | 0.12  | 145.7±9.4  | 29.54±2.62 | 1421±11    | 16.47±1.39 | 111.1±5.1  |
| TAG                               |                |          |          |       |            |            |            |            |            |
| [M+NH <sub>4</sub> ] <sup>+</sup> | 12:0/16:0/16:1 | 766.6911 | 766.6919 | -1.04 | 33.37±1.57 | 483.1±12.5 | 92.02±7.40 | 119.4±8.4  | 24.18±0.67 |
| [M+NH <sub>4</sub> ] <sup>+</sup> | 12:0/16:1/18:1 | 792.7076 | 792.7076 | 0.00  | 73.00±1.17 | 2356±203   | 505.7±23.6 | 49.37±2.71 | 54.96±1.19 |
| [M+NH <sub>4</sub> ] <sup>+</sup> | 14:0/14:0/16:0 | 768.7051 | 768.7076 | -3.25 | 16.95±1.65 | 267.2±17.7 | 52.74±0.71 | 250.9±2.4  | 23.36±1.68 |
| [M+NH <sub>4</sub> ] <sup>+</sup> | 14:0/15:0/16:0 | 782.7218 | 782.7232 | -1.79 | nd         | 206.4±7.6  | 42.73±1.27 | 172.6±4.3  | 8.98±0.92  |
| [M+NH <sub>4</sub> ] <sup>+</sup> | 14:0/16:0/16:0 | 796.7369 | 796.7389 | -2.51 | nd         | nd         | nd         | 673.8±27.6 | 89.90±7.78 |
| [M+NH <sub>4</sub> ] <sup>+</sup> | 14:0/16:0/16:1 | 794.7230 | 794.7232 | -0.25 | 169.9±7.5  | 2139±84    | 639.8±47.4 | 450.6±5.3  | 118.1±9.8  |
| [M+NH <sub>4</sub> ] <sup>+</sup> | 14:0/16:0/18:1 | 822.7551 | 822.7545 | 0.73  | 161.4±12.8 | 52.17±2.29 | 471.2±27.6 | 2193±70    | 136.5±4.8  |
| [M+NH <sub>4</sub> ] <sup>+</sup> | 14:0/16:1/18:1 | 820.7391 | 820.7389 | 0.24  | 1028±90    | 2790±198   | nd         | 268.5±18.9 | 74.53±3.07 |
| [M+NH <sub>4</sub> ] <sup>+</sup> | 14:0/18:0/18:1 | 850.7853 | 850.7858 | -0.59 | 204.9±11.8 | 6044±228   | 436.4±13.3 | 1085±80    | 30.76±2.32 |
| [M+NH <sub>4</sub> ] <sup>+</sup> | 15:0/16:0/16:1 | 808.7365 | 808.7389 | -2.97 | nd         | nd         | nd         | 320.2±24.3 | nd         |

|                                   |                   |           |           |       |             |            |            |            |             |
|-----------------------------------|-------------------|-----------|-----------|-------|-------------|------------|------------|------------|-------------|
| [M+NH <sub>4</sub> ] <sup>+</sup> | 15:0/17:1/21:5    | 882.7541  | 882.7545  | -0.45 | nd          | nd         | nd         | nd         | 92.52±1.23  |
| [M+NH <sub>4</sub> ] <sup>+</sup> | 16:0/14:1/18:2    | 818.7227  | 818.7232  | -0.61 | nd          | 5765±85    | nd         | nd         | nd          |
| [M+NH <sub>4</sub> ] <sup>+</sup> | 16:0/16:0/20:5    | 870.7534  | 870.7545  | -1.26 | 128.2±10.4  | 14410±879  | 1755±174   | 135.2±8.1  | 500.1±10.1  |
| [M+NH <sub>4</sub> ] <sup>+</sup> | 16:0/16:0/22:6    | 896.7678  | 896.7702  | -2.68 | nd          | nd         | 16.05±0.99 | 35.81±0.70 | 387.3±14.7  |
| [M+NH <sub>4</sub> ] <sup>+</sup> | 16:0/16:1/18:1    | 848.7704  | 848.7702  | 0.24  | 240.9±11.7  | 294.2±10.5 | 841.0±76.5 | 465.3±0.6  | 191.0±7.5   |
| [M+NH <sub>4</sub> ] <sup>+</sup> | 16:0/16:1/18:4    | 842.7234  | 842.7232  | 0.24  | 251.9±17.7  | nd         | 186.0±18.4 | 28.61±1.61 | 67.57±6.28  |
| [M+NH <sub>4</sub> ] <sup>+</sup> | 16:0/16:1/20:1    | 876.8014  | 876.8015  | -0.11 | 1343±69     | 10320±359  | 249.6±10.1 | 567.9±31.4 | 437.4±10.9  |
| [M+NH <sub>4</sub> ] <sup>+</sup> | 16:0/17:0/16:1    | 836.7698  | 836.7702  | -0.48 | 14.26±0.97  | 2325±200   | 49.43±1.54 | 122.1±9.8  | nd          |
| [M+NH <sub>4</sub> ] <sup>+</sup> | 16:0/17:0/18:1    | 864.8003  | 864.8015  | -1.39 | 42.04±2.20  | 1168±140   | 46.50±2.42 | 129.7±16.1 | 40.86±1.67  |
| [M+NH <sub>4</sub> ] <sup>+</sup> | 16:0/18:1/18:3    | 872.7703  | 872.7702  | 0.11  | nd          | 293.2±25.5 | nd         | nd         | nd          |
| [M+NH <sub>4</sub> ] <sup>+</sup> | 16:0/18:1/19:1    | 890.8163  | 890.8171  | -0.90 | 84.77±8.35  | 1333±121   | 133.7±7.4  | 343.1±16.1 | 105.5±5.8   |
| [M+NH <sub>4</sub> ] <sup>+</sup> | 16:0/18:1/20:1    | 904.8327  | 904.8328  | -0.11 | 1689±3      | 3871±21    | 714.5±21.7 | 372.8±15.2 | 111.2±6.2   |
| [M+NH <sub>4</sub> ] <sup>+</sup> | 16:0/18:1/22:1    | 932.8632  | 932.8641  | -0.96 | 874.6±64.5  | 824.0±1.9  | 359.9±14.4 | 61.64±3.40 | 257.8±17.5  |
| [M+NH <sub>4</sub> ] <sup>+</sup> | 16:0/20:1/18:2    | 902.8157  | 902.8171  | -1.55 | 3984±97     | 265.5±11.9 | 528.5±4.8  | 0.60±0.05  | nd          |
| [M+NH <sub>4</sub> ] <sup>+</sup> | 16:0/20:1/20:2    | 930.8475  | 930.8484  | -0.97 | 372.8±14.4  | 431.6±39.2 | 386.1±14.6 | nd         | 138.2±12.1  |
| [M+NH <sub>4</sub> ] <sup>+</sup> | 16:0/20:1/22:1    | 960.8935  | 960.8954  | -1.98 | 356.5±14.5  | 1128±57    | 154.4±14.2 | 55.90±1.71 | 172.1±11.9  |
| [M+NH <sub>4</sub> ] <sup>+</sup> | 16:0/20:1/24:1    | 988.9267  | 988.9267  | 0.00  | 130.1±9.8   | 209.9±18.4 | 118.5±8.8  | 35.54±2.53 | 24.96±1.45  |
| [M+NH <sub>4</sub> ] <sup>+</sup> | 16:0/24:0/18:1    | 962.9087  | 962.9110  | -2.39 | 46.86±4.32  | 616.1±18.2 | 179.2±7.1  | 48.57±3.25 | 43.95±2.03  |
| [M+NH <sub>4</sub> ] <sup>+</sup> | 16:1/16:1/18:1    | 846.7544  | 846.7545  | -0.12 | 650.5±62.1  | 134.6±7.8  | 3087±92    | nd         | 95.12±12.36 |
| [M+NH <sub>4</sub> ] <sup>+</sup> | 16:1/18:1/18:4    | 868.7396  | 868.7389  | 0.81  | 466.1±20.2  | 2792±106   | 473.0±23.4 | 22.83±1.02 | 96.63±12.31 |
| [M+NH <sub>4</sub> ] <sup>+</sup> | 16:1/18:1/22:1    | 930.8467  | 930.8484  | -1.83 | 608.0±18.5  | 1524±111   | 233.5±18.9 | nd         | 204.0±11.5  |
| [M+NH <sub>4</sub> ] <sup>+</sup> | 16:1/20:1/22:1    | 958.8796  | 958.8797  | -0.10 | 986.4±122.6 | 667.0±47.4 | 234.4±19.4 | nd         | 189.8±10.7  |
| [M+NH <sub>4</sub> ] <sup>+</sup> | 17:0/18:1/22:5    | 938.8156  | 938.8171  | -1.60 | nd          | 94.85±9.92 | 24.44±1.77 | 26.66±1.66 | 139.5±3.1   |
| [M+NH <sub>4</sub> ] <sup>+</sup> | 17:1/18:1/20:1    | 916.8310  | 916.8328  | -1.96 | 271.1±30.7  | nd         | 294.1±12.8 | 6.26±0.31  | 78.02±6.73  |
| [M+NH <sub>4</sub> ] <sup>+</sup> | 18:1/18:1/22:6    | 948.7990  | 948.8015  | -2.63 | 953.6±109.9 | 1167±106   | 259.3±6.9  | 48.06±1.59 | 48.63±2.05  |
| [M+NH <sub>4</sub> ] <sup>+</sup> | 18:1/18:3/14:1;10 | 858.7187  | 858.7181  | 0.70  | nd          | 67.53±1.37 | nd         | 12.03±0.85 | nd          |
| [M+NH <sub>4</sub> ] <sup>+</sup> | 18:1/20:1/22:1    | 986.9113  | 986.9110  | 0.30  | 380.4±26.1  | 290.6±17.8 | 112.0±14.3 | 12.41±1.11 | 44.30±2.06  |
| [M+NH <sub>4</sub> ] <sup>+</sup> | 18:1/20:1/24:1    | 1014.9410 | 1014.9423 | -1.28 | 151.2±3.7   | 119.4±4.3  | 55.86±1.82 | nd         | 12.20±0.82  |
| [M+NH <sub>4</sub> ] <sup>+</sup> | 18:1/22:1/24:1    | 1042.9710 | 1042.9736 | -2.49 | 90.02±8.97  | nd         | nd         | nd         | nd          |
| DAG                               |                   |           |           |       |             |            |            |            |             |
| [M+NH <sub>4</sub> ] <sup>+</sup> | 16:0/20:5         | 632.5244  | 632.5249  | -0.79 | 619.4±69.9  | nd         | 226.5±10.1 | 58.68±4.14 | 506.1±12.3  |
| [M+NH <sub>4</sub> ] <sup>+</sup> | 16:0/22:6         | 658.5399  | 658.5405  | -0.91 | 620.7±43.7  | 506.2±9.7  | 530.1±17.3 | nd         | 1159±67     |
| [M+NH <sub>4</sub> ] <sup>+</sup> | 18:1/18:3         | 634.5406  | 634.5405  | 0.16  | 72.99±5.31  | 469.7±27.2 | nd         | 19.43±0.97 | 50.97±3.50  |

|                                   |                     |          |          |       |            |            |            |            |            |
|-----------------------------------|---------------------|----------|----------|-------|------------|------------|------------|------------|------------|
| [M+NH <sub>4</sub> ] <sup>+</sup> | O-15:0/14:1         | 528.4987 | 528.4986 | 0.19  | 119.9±8.3  | 173.5±20.3 | 29.73±3.10 | 789.8±34.5 | 28.09±1.62 |
| [M+NH <sub>4</sub> ] <sup>+</sup> | O-17:0/14:1         | 556.5299 | 556.5299 | 0.00  | 1381±60    | 2829±84    | 1066±32    | 248.2±18.2 | 441.1±2.1  |
| LPG                               |                     |          |          |       |            |            |            |            |            |
| [M-H] <sup>-</sup>                | 15:0                | 469.2575 | 469.2572 | 0.64  | nd         | 1.09±0.15  | nd         | 61.06±0.85 | 11.48±1.10 |
| [M-H] <sup>-</sup>                | 16:1                | 481.2574 | 481.2572 | 0.42  | nd         | nd         | nd         | 59.45±0.70 | nd         |
| [M-H] <sup>-</sup>                | 18:1                | 509.2890 | 509.2885 | 0.98  | nd         | nd         | nd         | 57.46±1.53 | nd         |
| [M-H] <sup>-</sup>                | 20:2                | 535.3041 | 535.3041 | 0.00  | nd         | nd         | nd         | 56.33±2.43 | nd         |
| [M-H] <sup>-</sup>                | 20:5                | 529.2580 | 529.2572 | 1.51  | nd         | nd         | nd         | 54.26±0.12 | nd         |
| [M-H] <sup>-</sup>                | 22:6                | 555.2730 | 555.2728 | 0.36  | nd         | nd         | nd         | 54.48±1.38 | nd         |
| [M-H] <sup>-</sup>                | O-15:4              | 447.2169 | 447.2153 | 3.58  | 85.84±4.29 | 3.95±0.06  | 1.68±0.11  | 65.32±1.65 | nd         |
| [M-H] <sup>-</sup>                | O-24:6              | 569.3235 | 569.3249 | -2.46 | nd         | nd         | nd         | 53.71±0.53 | nd         |
| PG                                |                     |          |          |       |            |            |            |            |            |
| [M-H] <sup>-</sup>                | 15:0/15:0           | 693.4713 | 693.4712 | 0.14  | nd         | nd         | nd         | nd         | 35.77±0.38 |
| [M-H] <sup>-</sup>                | 16:0/18:1           | 747.5182 | 747.5182 | 0.00  | 50.02±1.76 | nd         | 27.86±0.99 | 14.17±0.92 | 60.67±3.47 |
| [M-H] <sup>-</sup>                | 16:0/20:2           | 773.5338 | 773.5338 | 0.00  | 48.07±1.54 | nd         | 28.89±1.07 | 37.52±0.29 | 49.58±2.49 |
| [M-H] <sup>-</sup>                | 16:0/20:4           | 769.5034 | 769.5025 | 1.17  | 9.57±0.45  | nd         | 11.51±1.22 | nd         | 33.91±1.11 |
| [M-H] <sup>-</sup>                | 16:1/20:4           | 767.4872 | 767.4869 | 0.39  | 5.96±0.21  | nd         | 27.44±0.38 | nd         | 44.22±3.12 |
| [M-H] <sup>-</sup>                | 18:0/20:5           | 795.5191 | 795.5182 | 1.13  | 3.85±0.16  | nd         | 27.22±0.69 | nd         | 31.31±0.56 |
| [M-H] <sup>-</sup>                | 18:1/20:5           | 793.5032 | 793.5025 | 0.88  | nd         | nd         | 26.48±0.77 | nd         | 13.42±0.56 |
| CL                                |                     |          |          |       |            |            |            |            |            |
| [M-2H] <sup>2-</sup>              | 16:0/16:1/18:1/20:3 | 712.4847 | 712.4867 | -2.81 | 5.45±0.45  | nd         | nd         | nd         | 17.37±1.16 |
| [M-2H] <sup>2-</sup>              | 16:0/18:1/18:1/18:1 | 714.5085 | 714.5023 | 8.68  | 10.00±0.32 | nd         | 66.75±1.76 | nd         | nd         |
| [M-2H] <sup>2-</sup>              | 16:1/16:1/18:1/18:1 | 699.4788 | 699.4788 | 0.00  | 4.58±0.30  | nd         | 1.98±0.18  | nd         | 2.86±0.11  |
| [M-2H] <sup>2-</sup>              | 16:1/18:1/18:1/18:1 | 713.4952 | 713.4945 | 0.98  | 1.24±0.12  | nd         | 1.57±0.07  | nd         | nd         |
| [M-2H] <sup>2-</sup>              | 16:1/18:1/18:1/20:3 | 725.4929 | 725.4945 | -2.21 | 6.99±0.12  | nd         | 1.62±0.16  | nd         | nd         |
| [M-2H] <sup>2-</sup>              | 16:1/18:1/18:1/20:5 | 723.4788 | 723.4788 | 0.00  | 33.83±2.35 | nd         | 67.44±5.02 | 1.84±0.11  | 32.37±2.36 |
| [M-2H] <sup>2-</sup>              | 16:1/18:1/20:3/20:3 | 737.4955 | 737.4945 | 1.36  | 73.94±3.96 | nd         | 145.5±5.8  | nd         | nd         |
| [M-2H] <sup>2-</sup>              | 16:1/18:2/20:5/22:6 | 745.4623 | 745.4632 | -1.21 | nd         | nd         | nd         | nd         | 33.58±0.28 |
| [M-2H] <sup>2-</sup>              | 16:1/20:1/20:5/20:5 | 747.4788 | 747.4788 | 0.00  | 11.4±0.9   | nd         | nd         | nd         | nd         |
| [M-2H] <sup>2-</sup>              | 16:1/20:3/20:3/20:3 | 749.4943 | 749.4945 | -0.27 | nd         | nd         | nd         | nd         | 35.94±0.75 |
| [M-2H] <sup>2-</sup>              | 17:1/17:1/17:1/18:2 | 705.4871 | 705.4788 | 11.77 | 7.90±0.50  | 5.52±0.37  | 12.29±1.12 | nd         | 11.48±0.78 |
| [M-2H] <sup>2-</sup>              | 18:0/18:1/18:1/18:3 | 726.5018 | 726.5023 | -0.69 | 12.75±1.72 | nd         | 16.88±2.06 | nd         | 9.80±1.49  |
| [M-2H] <sup>2-</sup>              | 18:0/18:1/20:4/22:4 | 764.5252 | 764.5180 | 9.42  | nd         | nd         | nd         | nd         | 261.5±14.5 |

|                      |                     |          |          |       |            |    |            |    |            |
|----------------------|---------------------|----------|----------|-------|------------|----|------------|----|------------|
| [M-2H] <sup>2-</sup> | 18:0/18:1/20:5/22:5 | 762.5086 | 762.5023 | 8.26  | 256.0±26.0 | nd | 18.62±1.44 | nd | 276.0±9.3  |
| [M-2H] <sup>2-</sup> | 18:0/20:3/22:6/22:6 | 786.5027 | 786.5023 | 0.51  | nd         | nd | nd         | nd | 9.15±0.44  |
| [M-2H] <sup>2-</sup> | 18:0/20:4/22:6/22:6 | 785.4921 | 785.4945 | -3.06 | nd         | nd | nd         | nd | 9.52±0.49  |
| [M-2H] <sup>2-</sup> | 18:0/24:3/20:5/22:5 | 802.5394 | 802.5336 | 7.23  | nd         | nd | 3.51±0.08  | nd | 63.03±0.01 |
| [M-2H] <sup>2-</sup> | 18:1/18:1/18:2/20:5 | 736.4912 | 736.4867 | 6.11  | 75.73±3.07 | nd | 351.2±13.5 | nd | 115.6±9.3  |
| [M-2H] <sup>2-</sup> | 18:1/20:2/20:5/20:6 | 759.4791 | 759.4788 | 0.40  | nd         | nd | 11.83±0.93 | nd | 53.01±1.53 |
| [M-2H] <sup>2-</sup> | 18:1/20:2/20:6/22:6 | 772.4861 | 772.4867 | -0.78 | nd         | nd | nd         | nd | 33.52±1.04 |
| [M-2H] <sup>2-</sup> | 18:1/20:3/20:3/20:5 | 761.4956 | 761.4945 | 1.44  | 6.21±0.56  | nd | nd         | nd | 33.84±0.75 |
| [M-2H] <sup>2-</sup> | 18:1/20:4/20:5/22:6 | 771.4778 | 771.4788 | -1.30 | nd         | nd | 4.35±0.24  | nd | 17.72±0.95 |
| [M-2H] <sup>2-</sup> | 18:1/20:5/22:6/22:6 | 783.4784 | 783.4788 | -0.51 | nd         | nd | 3.15±0.08  | nd | 31.68±0.56 |
| [M-2H] <sup>2-</sup> | 24:0/16:1/16:1/18:1 | 742.5401 | 742.5336 | 8.75  | 9.49±0.66  | nd | nd         | nd | 2.93±0.73  |
| [M-2H] <sup>2-</sup> | 24:0/18:1/20:5/20:5 | 790.5402 | 790.5336 | 8.35  | 21.39±2.15 | nd | 66.66±3.41 | nd | 25.08±1.35 |

SM

|                       |              |          |          |       |            |         |            |            |            |
|-----------------------|--------------|----------|----------|-------|------------|---------|------------|------------|------------|
| [M+HCOO] <sup>-</sup> | 12:1;2O/18:0 | 691.5031 | 691.5032 | -0.14 | 1032±47    | 1108±10 | 57.63±3.18 | 134.2±8.4  | 694.6±16.7 |
| [M+HCOO] <sup>-</sup> | 12:1;2O/21:0 | 733.5507 | 733.5501 | 0.82  | 141.4±5.6  | nd      | 569.9±25.3 | 773.4±3.2  | nd         |
| [M+HCOO] <sup>-</sup> | 12:1;2O/24:1 | 773.5820 | 773.5814 | 0.78  | 1172±79    | nd      | 765.7±30.2 | 34.34±2.86 | 184.7±7.3  |
| [M+HCOO] <sup>-</sup> | 14:1;2O/18:0 | 719.5349 | 719.5345 | 0.56  | 998.9±46.5 | nd      | 1106±36    | 856.8±10.1 | 701.6±15.6 |
| [M+HCOO] <sup>-</sup> | 14:1;2O/20:0 | 747.5669 | 747.5658 | 1.47  | 617.0±11.8 | nd      | 643.6±28.7 | 850.9±25.1 | 667.9±14.6 |
| [M+HCOO] <sup>-</sup> | 14:1;2O/21:0 | 761.5832 | 761.5814 | 2.36  | nd         | nd      | nd         | 730.0±5.5  | 71.14±2.73 |
| [M+HCOO] <sup>-</sup> | 14:1;2O/22:0 | 775.5981 | 775.5971 | 1.29  | nd         | nd      | 9.63±1.46  | 754.9±8.6  | 662.4±17.4 |

PA

|                    |           |          |          |      |            |    |            |            |            |
|--------------------|-----------|----------|----------|------|------------|----|------------|------------|------------|
| [M-H] <sup>-</sup> | 16:0/16:1 | 645.4501 | 645.4501 | 0.00 | 18.41±1.31 | nd | 469.1±15.1 | nd         | nd         |
| [M-H] <sup>-</sup> | 16:0/18:1 | 673.4819 | 673.4814 | 0.74 | 238.3±20.5 | nd | 472.6±17.5 | nd         | 178.4±9.3  |
| [M-H] <sup>-</sup> | 16:0/20:5 | 693.4506 | 693.4501 | 0.72 | 148.7±8.4  | nd | 434.6±16.1 | nd         | 529.4±2.1  |
| [M-H] <sup>-</sup> | 16:1/18:1 | 671.4662 | 671.4657 | 0.74 | 21.93±1.69 | nd | 450.6±10.6 | nd         | 537.0±13.1 |
| [M-H] <sup>-</sup> | 18:0/20:5 | 721.4819 | 721.4814 | 0.69 | 765.2±44.5 | nd | 509.1±13.1 | nd         | 580.3±39.3 |
| [M-H] <sup>-</sup> | 18:1/18:1 | 699.4974 | 699.4970 | 0.57 | nd         | nd | 435.9±11.9 | nd         | 111.3±9.0  |
| [M-H] <sup>-</sup> | 18:1/20:1 | 727.5295 | 727.5283 | 1.65 | 17.54±1.14 | nd | 399.3±1.7  | nd         | nd         |
| [M-H] <sup>-</sup> | 18:1/20:5 | 719.4662 | 719.4657 | 0.69 | 750.6±41.4 | nd | 439.1±17.9 | nd         | 533.5±1.3  |
| [M-H] <sup>-</sup> | 18:1/22:6 | 745.4818 | 745.4814 | 0.54 | 730.4±16.1 | nd | 406.5±7.9  | 15.96±1.54 | 417.0±18.2 |
| [M-H] <sup>-</sup> | 18:2/18:2 | 695.4662 | 695.4657 | 0.72 | 598.3±28.6 | nd | nd         | 49.54±3.27 | nd         |
| [M-H] <sup>-</sup> | 20:5/22:6 | 765.4503 | 765.4501 | 0.26 | nd         | nd | nd         | nd         | 77.50±6.72 |

LPI

|                    |             |          |          |      |                 |            |            |            |            |
|--------------------|-------------|----------|----------|------|-----------------|------------|------------|------------|------------|
| [M-H] <sup>-</sup> | 18:1        | 597.3051 | 597.3045 | 1.00 | 1.83±0.04<br>PI | nd         | nd         | nd         | 100.4±0.1  |
| [M-H] <sup>-</sup> | 16:0/20:5   | 855.5036 | 855.5029 | 0.82 | nd              | nd         | 201.0±13.6 | 205.3±8.8  | nd         |
| [M-H] <sup>-</sup> | 16:1/18:1   | 833.5196 | 833.5186 | 1.20 | nd              | nd         | 62.13±1.06 | nd         | nd         |
| [M-H] <sup>-</sup> | 16:1/20:5   | 853.4878 | 853.4873 | 0.59 | 111.6±3.8       | nd         | 33.22±2.67 | nd         | 77.7±3.1   |
| [M-H] <sup>-</sup> | 17:0/20:2   | 875.5657 | 875.5655 | 0.23 | nd              | nd         | 58.64±1.51 | nd         | nd         |
| [M-H] <sup>-</sup> | 17:0/20:5   | 869.5190 | 869.5186 | 0.46 | 111.4±1.3       | 6.57±0.39  | 66.98±2.29 | 82.03±0.19 | 103.6±8.6  |
| [M-H] <sup>-</sup> | 17:1/18:1   | 847.5348 | 847.5342 | 0.71 | nd              | nd         | 59.02±0.12 | nd         | nd         |
| [M-H] <sup>-</sup> | 17:1/20:5   | 867.5039 | 867.5029 | 1.15 | nd              | nd         | 60.03±0.91 | nd         | 2.73±0.22  |
| [M-H] <sup>-</sup> | 18:0/20:5   | 883.5354 | 883.5342 | 1.36 | nd              | 34.47±2.42 | nd         | 94.30±7.90 | 163.9±9.2  |
| [M-H] <sup>-</sup> | 18:1/18:1   | 861.5511 | 861.5499 | 1.39 | 109.8±3.5       | nd         | nd         | nd         | nd         |
| [M-H] <sup>-</sup> | 18:1/20:4;O | 899.5298 | 899.5291 | 0.78 | nd              | nd         | nd         | nd         | 4.64±0.36  |
| [M-H] <sup>-</sup> | 18:1/20:5   | 881.5190 | 881.5186 | 0.45 | 210.0±10.2      | 112.6±2.0  | 221.6±21.8 | 110.7±12.5 | 186.4±8.0  |
| [M-H] <sup>-</sup> | 18:1/20:5;O | 897.5137 | 897.5135 | 0.22 | 115.8±8.3       | nd         | nd         | nd         | 1.75±0.07  |
| [M-H] <sup>-</sup> | 18:1/22:6   | 907.5344 | 907.5342 | 0.22 | 109.2±5.5       | 108.2±0.4  | 73.48±1.88 | nd         | nd         |
| [M-H] <sup>-</sup> | 18:2/20:5   | 879.5032 | 879.5029 | 0.34 | 107.3±2.8       | 111.2±0.2  | 60.88±1.94 | nd         | 74.45±2.01 |
| [M-H] <sup>-</sup> | 19:0/20:5   | 897.5504 | 897.5499 | 0.56 | 108.7±4.1       | nd         | nd         | nd         | 15.31±0.90 |
| [M-H] <sup>-</sup> | 19:1/20:5   | 895.5348 | 895.5342 | 0.67 | 108.4±3.1       | 1.18±0.15  | 62.30±1.54 | 15.28±1.10 | 70.32±1.71 |
| [M-H] <sup>-</sup> | 20:1/20:5   | 909.5505 | 909.5499 | 0.66 | 127.4±14.1      | nd         | 44.44±2.17 | 27.82±1.50 | nd         |
| [M-H] <sup>-</sup> | 20:2/20:5   | 907.5349 | 907.5342 | 0.77 | nd              | nd         | nd         | nd         | 76.02±3.10 |
| [M-H] <sup>-</sup> | 20:4/18:2;O | 897.5146 | 897.5135 | 1.23 | nd              | nd         | nd         | nd         | 69.80±1.77 |
| [M-H] <sup>-</sup> | 20:4/20:5   | 903.5044 | 903.5029 | 1.66 | nd              | nd         | nd         | 4.65±0.29  | 68.74±0.48 |
| [M-H] <sup>-</sup> | 20:5/20:5   | 901.4877 | 901.4873 | 0.44 | 298.0±11.65     | nd         | 57.51±1.04 | 3.28±0.13  | 2.48±0.11  |
| [M-H] <sup>-</sup> | 22:2/20:5   | 935.5665 | 935.5655 | 1.07 | nd              | nd         | 1.14±0.14  | nd         | 65.42±1.79 |
| [M-H] <sup>-</sup> | O-16:0/20:5 | 841.4875 | 841.4873 | 0.24 | 148.1±12.4      | 114.6±1.8  | 134.6±11.8 | 85.52±1.61 | 216.2±4.9  |
| [M-H] <sup>-</sup> | O-18:0/20:5 | 869.5549 | 869.5549 | 0.00 | nd              | nd         | 62.26±2.04 | nd         | nd         |
| [M-H] <sup>-</sup> | O-18:1/20:5 | 867.5394 | 867.5393 | 0.12 | 216.0±4.4       | nd         | nd         | nd         | nd         |

nd: not detected

**Table S6.** Concentrations of different lipid classes in five kinds of crab muscles (ng/kg)

| Species | <i>P. camtschaticus</i>  | <i>E. sinensis</i>       | <i>C. magister</i>      | <i>P. trituberculatus</i> | <i>C. pagurus</i>       |
|---------|--------------------------|--------------------------|-------------------------|---------------------------|-------------------------|
| LPC     | 225.7±30.6 <sup>bc</sup> | 316.2±9.1 <sup>b</sup>   | 222.3±2.2 <sup>bc</sup> | 1721±89 <sup>a</sup>      | 132.3±0.9 <sup>c</sup>  |
| PC      | 7522±160 <sup>a</sup>    | 2262±50 <sup>d</sup>     | 4610±114 <sup>b</sup>   | 1153±51 <sup>c</sup>      | 3438±77 <sup>c</sup>    |
| LPE     | 123.8±9.2 <sup>d</sup>   | 269.5±15.2 <sup>b</sup>  | 168.0±5.2 <sup>c</sup>  | 1141±22 <sup>a</sup>      | 87.24±1.06 <sup>e</sup> |
| PE      | 11218±460 <sup>b</sup>   | 20459±309 <sup>a</sup>   | 8997±143 <sup>c</sup>   | 4657±66 <sup>c</sup>      | 7704±124 <sup>d</sup>   |
| TAG     | 6284±257 <sup>a</sup>    | 5619±389 <sup>b</sup>    | 1626±48 <sup>c</sup>    | 1719±168 <sup>c</sup>     | 1884±85 <sup>c</sup>    |
| DAG     | 1500±66 <sup>a</sup>     | 450.2±14.1 <sup>b</sup>  | 288.8±3.8 <sup>c</sup>  | 86.05±10.95 <sup>d</sup>  | 133.2±2.8 <sup>d</sup>  |
| SM      | 3416±158 <sup>a</sup>    | 1613±45 <sup>c</sup>     | 1598±36 <sup>c</sup>    | 2350±42 <sup>b</sup>      | 869.9±22.5 <sup>d</sup> |
| CL      | 124.3±5.2 <sup>d</sup>   | 191.8±26.4 <sup>cd</sup> | 817.9±38.7 <sup>a</sup> | 169.0±7.8 <sup>c</sup>    | 528.3±21.0 <sup>b</sup> |
| LPG     | nd                       | nd                       | nd                      | 61.98±1.84 <sup>a</sup>   | nd                      |
| PG      | 75.89±4.37 <sup>c</sup>  | 85.96±2.74 <sup>c</sup>  | 166.7±9.7 <sup>a</sup>  | 142.2±3.0 <sup>b</sup>    | 163.7±10.5 <sup>a</sup> |
| LPA     | 176.5±9.9 <sup>b</sup>   | 51.24±1.77 <sup>d</sup>  | 83.84±4.28 <sup>c</sup> | 274.1±4.1 <sup>a</sup>    | 52.62±1.38 <sup>d</sup> |
| PA      | 6783±228 <sup>a</sup>    | 1815±95.79 <sup>c</sup>  | 2531±111 <sup>b</sup>   | 381.6±8.17 <sup>c</sup>   | 1365±55 <sup>d</sup>    |
| LPI     | 1.73±0.08 <sup>cd</sup>  | 17.79±0.58 <sup>b</sup>  | 0.69±0.06 <sup>d</sup>  | 18.92±0.75 <sup>a</sup>   | 1.89±0.10 <sup>c</sup>  |
| PI      | 544.3±29.7 <sup>b</sup>  | 615.5±34.5 <sup>a</sup>  | 619.0±35.6 <sup>a</sup> | 332.5±18.1 <sup>c</sup>   | 669.1±1.0 <sup>a</sup>  |

nd means not detected; Data are expressed as the mean ± SD. Different letters in the same row indicate significant difference ( $p < 0.05$ ) among different samples.

**Table S7.** The concentrations of different lipid classes of five kinds of edible viscera (ng/kg)

| Species | <i>P. camtschaticus</i> | <i>E. sinensis</i>      | <i>C. magister</i>      | <i>P. trituberculatus</i> | <i>C. pagurus</i>       |
|---------|-------------------------|-------------------------|-------------------------|---------------------------|-------------------------|
| LPC     | 269.4±7.8 <sup>c</sup>  | 24.53±1.10 <sup>d</sup> | 1508±48 <sup>a</sup>    | 1477±48 <sup>a</sup>      | 601.9±18.1 <sup>b</sup> |
| PC      | 4624±129 <sup>b</sup>   | 1130±38 <sup>e</sup>    | 19196±313 <sup>a</sup>  | 1726±67 <sup>d</sup>      | 3755±80 <sup>c</sup>    |
| LPE     | 141.0±7.9 <sup>c</sup>  | 15.67±0.83 <sup>d</sup> | 457.3±10.5 <sup>a</sup> | 178.5±5.1 <sup>b</sup>    | 189.1±10.9 <sup>b</sup> |
| PE      | 7319±105 <sup>b</sup>   | 1826±66 <sup>d</sup>    | 23615±394 <sup>a</sup>  | 3040±6 <sup>c</sup>       | 7234±38 <sup>b</sup>    |
| TAG     | 14260±68 <sup>b</sup>   | 55795±1378 <sup>a</sup> | 11075±182 <sup>c</sup>  | 6796±129 <sup>d</sup>     | 3591±61 <sup>e</sup>    |
| DAG     | 1678±30 <sup>b</sup>    | 2297±45 <sup>a</sup>    | 1101±16 <sup>d</sup>    | 604.9±8.3 <sup>e</sup>    | 1376±37 <sup>c</sup>    |
| LPG     | 38.39±1.57 <sup>b</sup> | 2.28±0.07 <sup>d</sup>  | 0.75±0.04 <sup>d</sup>  | 235.4±1.7 <sup>a</sup>    | 5.38±0.42 <sup>c</sup>  |
| PG      | 89.58±2.09 <sup>c</sup> | nd                      | 115.7±1.3 <sup>b</sup>  | 39.62±0.61 <sup>d</sup>   | 204.1±6.0 <sup>a</sup>  |
| CL      | 402.2±8.9 <sup>c</sup>  | 3.89±0.21 <sup>d</sup>  | 571.5±17.4 <sup>b</sup> | 1.33±0.07 <sup>d</sup>    | 818.1±13.9 <sup>a</sup> |
| SM      | 2904±46 <sup>b</sup>    | 766.1±5.9 <sup>e</sup>  | 2334±71 <sup>c</sup>    | 3080±22 <sup>a</sup>      | 2223±43 <sup>b</sup>    |
| PA      | 2355±24 <sup>b</sup>    | nd                      | 2806±42 <sup>a</sup>    | 46.35±2.80 <sup>d</sup>   | 2098±15 <sup>c</sup>    |
| LPI     | 1.09±0.02 <sup>b</sup>  | nd                      | nd                      | nd                        | 59.94±0.03 <sup>a</sup> |
| PI      | 1660±32 <sup>a</sup>    | 428.9±4.9 <sup>e</sup>  | 1095±26 <sup>c</sup>    | 545.9±15.1 <sup>b</sup>   | 1186±25 <sup>d</sup>    |

nd means not detected; Data are expressed as the mean ± SD. Different letters in the same row indicate significant difference ( $p < 0.05$ ) among different samples.



**Table S8.** The significantly different lipids in muscle and edible viscera of five crab species

| Muscle                 |      |                | Edible Viscera         |      |                |
|------------------------|------|----------------|------------------------|------|----------------|
| Compounds              | VIP  | <i>p</i> value | Compounds              | VIP  | <i>p</i> value |
| PE 16:0/22:6           | 3.35 | <0.05          | TAG 16:0/20:1/18:2     | 3.15 | <0.01          |
| PE P-18:0/20:5         | 2.86 | <0.05          | SM 14:1;2O/22:0        | 1.85 | <0.01          |
| PA 16:0/22:6           | 2.68 | <0.01          | PE 18:1/20:5           | 1.78 | <0.05          |
| PC 16:0/16:1           | 2.39 | <0.05          | TAG 16:0/18:1/20:1     | 1.63 | <0.01          |
| TAG 16:0/16:1/18:1     | 2.23 | <0.05          | TAG 16:0/16:0/22:6     | 1.56 | <0.01          |
| PE P-20:1/20:5         | 2.15 | <0.05          | PA 16:1/18:1           | 1.49 | <0.05          |
| PE P-19:0/20:4         | 1.86 | <0.01          | SM 12:1;2O/18:0        | 1.44 | <0.05          |
| SM 14:1;2O/18:0        | 1.86 | <0.05          | TAG 14:0/16:1/18:1     | 1.42 | <0.05          |
| PA 18:0/20:5           | 1.65 | <0.05          | SM 12:1;2O/24:1        | 1.41 | <0.05          |
| PC 22:2/18:5           | 1.60 | <0.05          | PE P-16:0/20:5         | 1.35 | <0.01          |
| SM 12:1;2O/20:0        | 1.59 | <0.01          | CL 18:0/18:1/20:4/22:4 | 1.31 | <0.01          |
| CL 18:1/18:2/22:6/22:6 | 1.49 | <0.01          | PA 18:2/18:2           | 1.25 | <0.01          |
| DAG 18:1/20:5          | 1.44 | <0.01          | DAG O-17:0/14:1        | 1.25 | <0.01          |
| PE 18:1/22:6           | 1.38 | <0.05          | TAG 16:1/20:1/22:1     | 1.22 | <0.01          |
| TAG 18:2/18:2/18:2     | 1.37 | <0.01          | TAG 18:1/18:1/22:6     | 1.21 | <0.01          |
| PA 18:0/20:4           | 1.36 | <0.05          | TAG 16:0/18:1/22:1     | 1.02 | <0.01          |
| TAG 18:1/18:1/20:5     | 1.33 | <0.01          | LPC 16:0               | 1.01 | <0.05          |
| TAG 18:1/18:1/20:1     | 1.30 | <0.01          |                        |      |                |
| PC 15:1/20:5           | 1.29 | <0.01          |                        |      |                |
| PC 18:1/18:1           | 1.29 | <0.01          |                        |      |                |
| SM 14:1;2O/22:0        | 1.13 | <0.01          |                        |      |                |
| DAG 16:0/20:5          | 1.10 | <0.01          |                        |      |                |
| PC 17:1/18:1           | 1.04 | <0.05          |                        |      |                |
| PI 18:0/20:5           | 1.03 | <0.05          |                        |      |                |
| CL 18:1/20:5/22:6/22:6 | 1.02 | <0.01          |                        |      |                |
| PE P-20:1/22:6         | 1.01 | <0.05          |                        |      |                |
